# Supplementary material for: Germline BRCA2 mutations drive prostate cancers with distinct evolutionary trajectories
Source: PubMed Central journal article supplement (PMC5227331; doi:10.1038/ncomms13671), 2017-01-09
Supplement: ncomms13671-s1.pdf [file ncomms13671-s1.pdf]

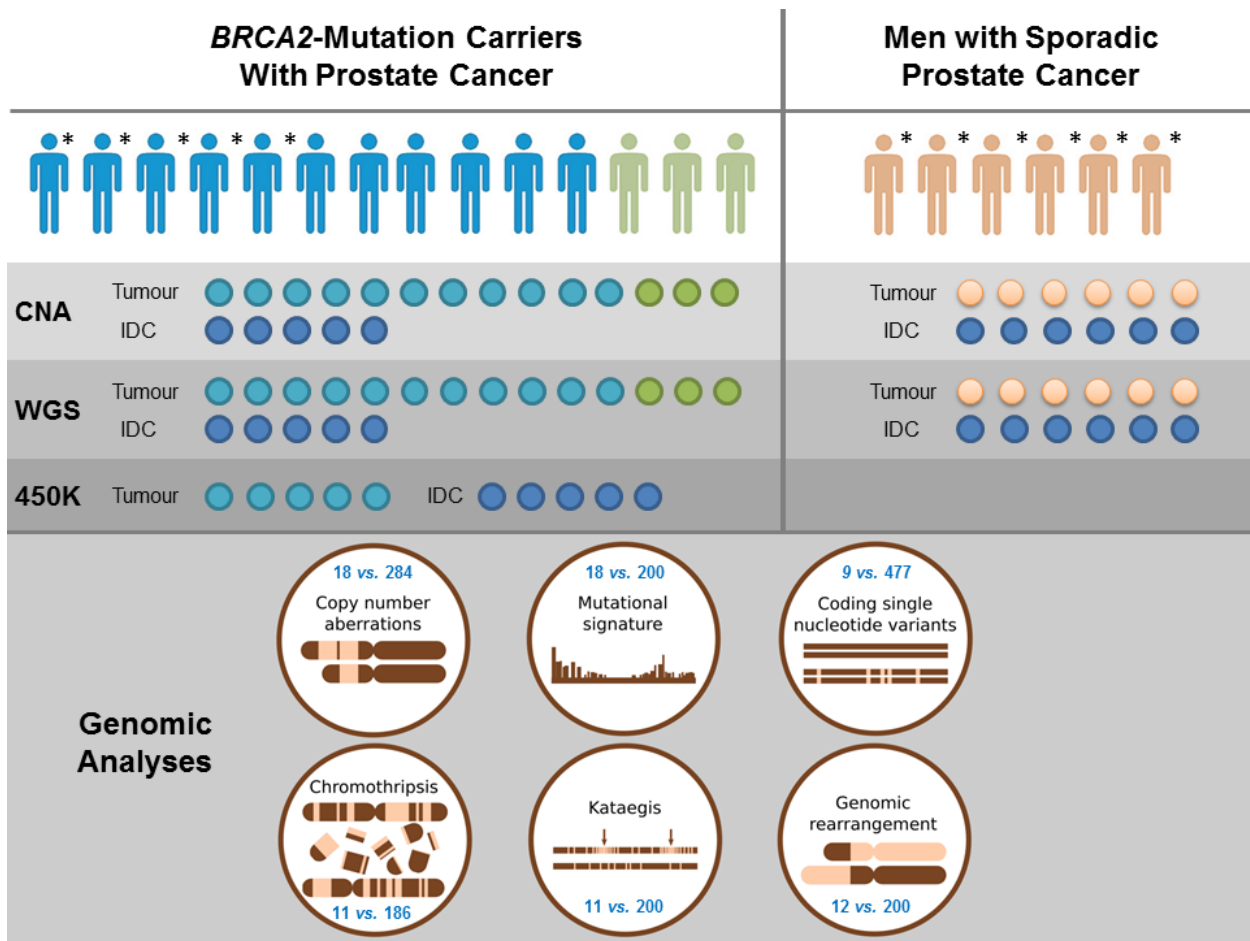

### Supplementary Figure 1 | Overall study design

We obtained 19 tumour specimens from 14 men with prostate cancer who harboured pathogenic germline *BRCA2*-mutations. Germline DNA was available for five patients and for 11/14 patients, we obtained isolated invasive carcinoma (IC) tissue (IC; represented by blue men). Intraductal carcinoma (IDC) was micro-dissected from five of these 11 patient specimens (represented as asterisks). For the remaining 3/14 patients, specimens were obtained from mixed IC and IDC pathologies (represented as the green men). We subjected 18/19 specimens to copy number profiling (one specimen failed QC) and 12/19 specimens were subjected to whole genome sequencing (WGS; plus germline DNA from five patients). Further, 10/19 specimens had methylome interrogation (5 IC, 5 IDC). In addition, IC and IDC were also micro-dissected from six men with sporadic (*i.e.* non-familial) PCa (orange). These additional 12 sporadic PCa specimens (in addition to blood-derived germline DNA) were also subjected to whole-genome sequencing and CNA analysis. We conducted analyses and comparisons to publically available data from localized, sporadic prostate cancers. For CNAs, we compared 18 *BRCA2*-mutant PCa specimens (14 IC, 4 IDC) to 284 sporadic PCa. For mutational signatures, we compared 18 *BRCA2*-mutant PCa specimens (14 IC, 4 IDC) to 200 sporadic PCa specimens. For single nucleotide variant analysis in gene coding regions, we compared nine *BRCA2*-mutant PCa specimens (5 IC, 4 IDC) to 477 sporadic PCa. For chromothripsis and kataegis analysis, we compared 11 *BRCA2*-mutant PCa specimens (3 IDC, 8 IC) to 186 and 200 sporadic PCa specimens, respectively. For genomic rearrangements, we compared 12 (7 IC, 5 IDC) *BRCA2*-mutant PCa specimens to 200 sporadic PCa specimens.

**a**

BR9001\_IDC-P

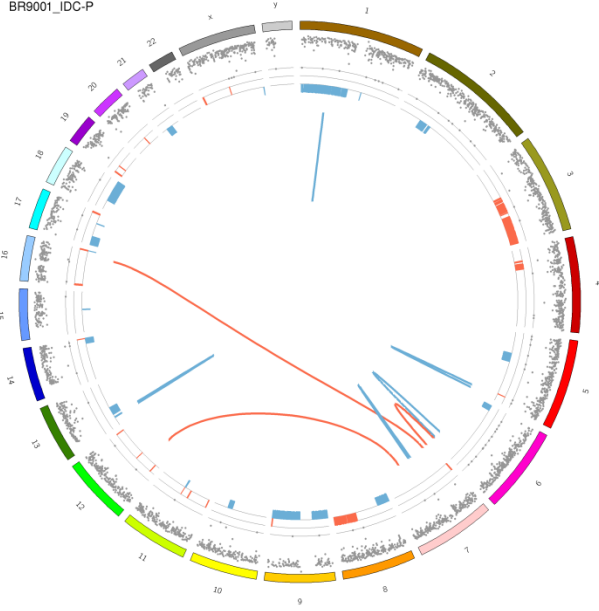

BR9001\_Invasive\_Carcinoma

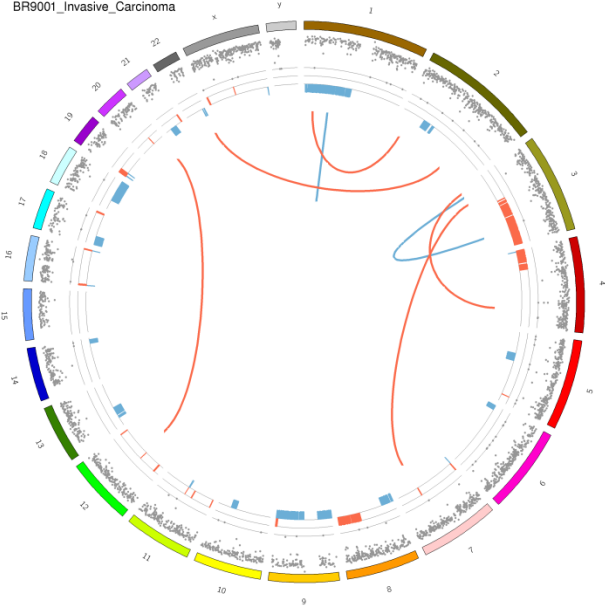

**b**

BR9002\_IDC-P

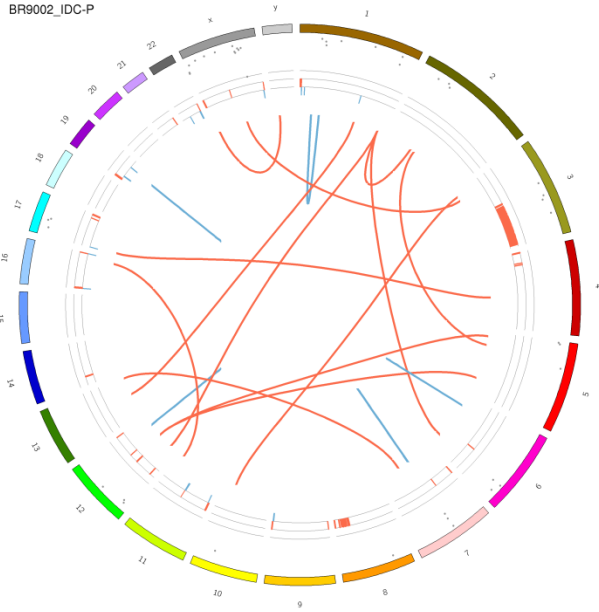

BR9002\_Invasive\_Carcinoma

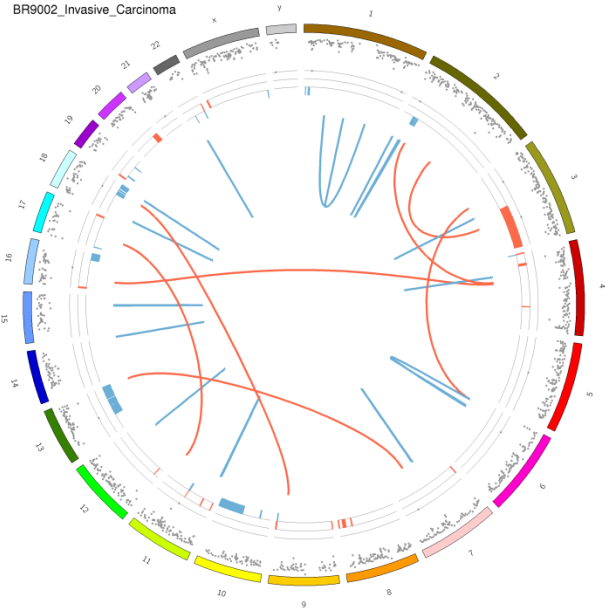

**c**

BR9003\_IDC-P

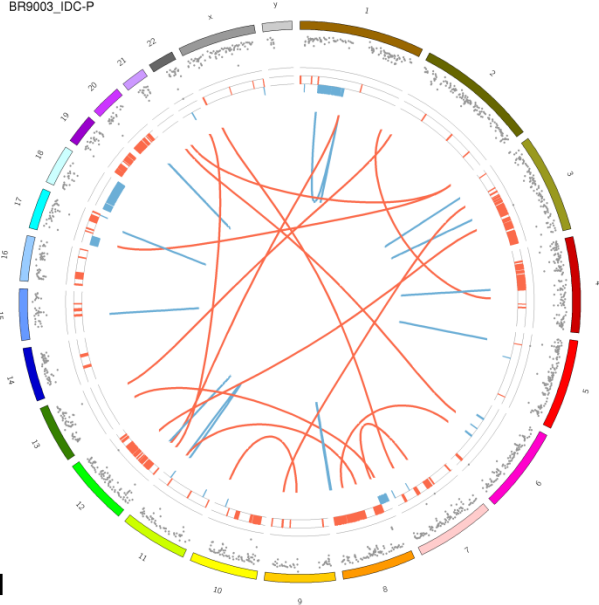

BR9003\_Invasive\_Carcinoma

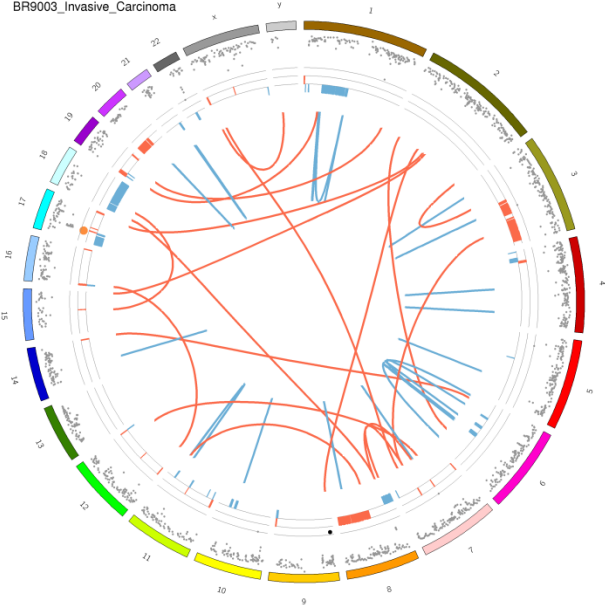

**d**

BR9004\_IDC-P

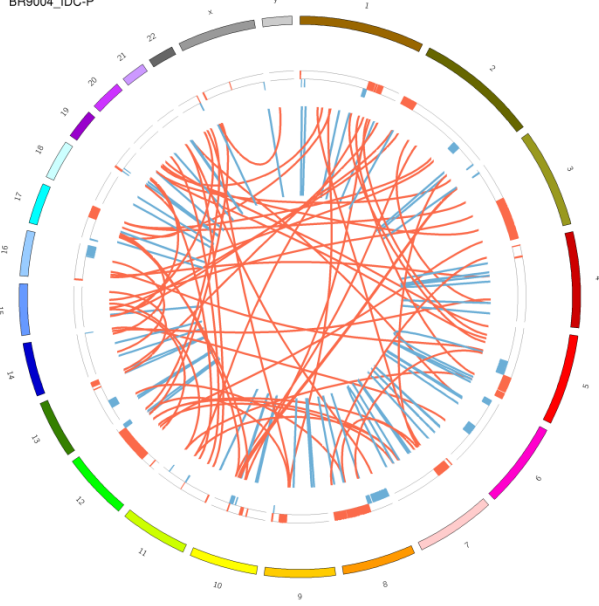

BR9004\_Invasive\_Carcinoma

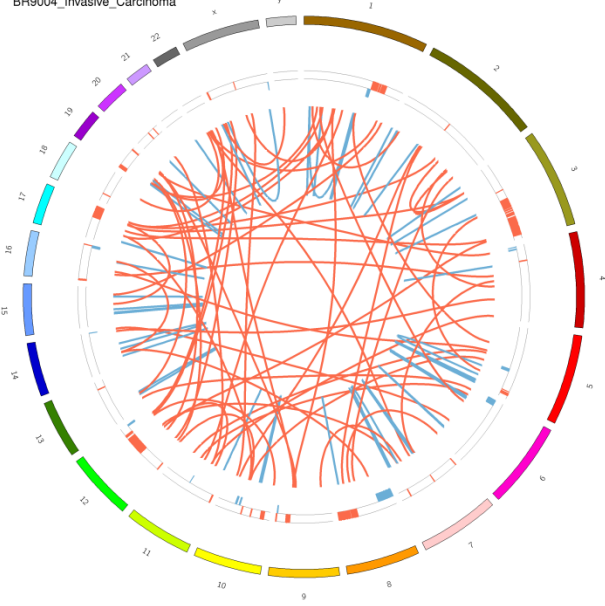

**e**

BR9005\_IDC-P

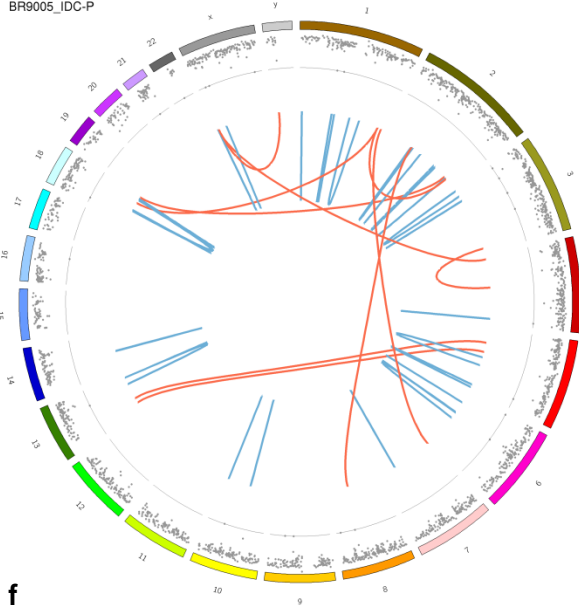

BR9005\_Invasive\_Carcinoma

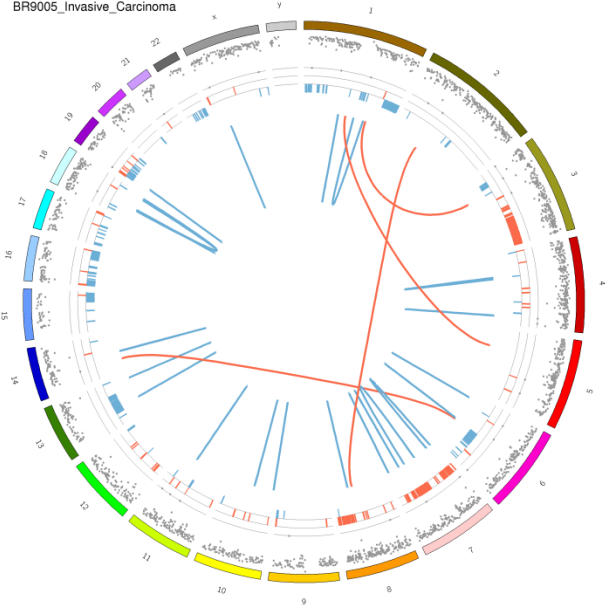

**f**

BR0450\_Invasive\_Carcinoma

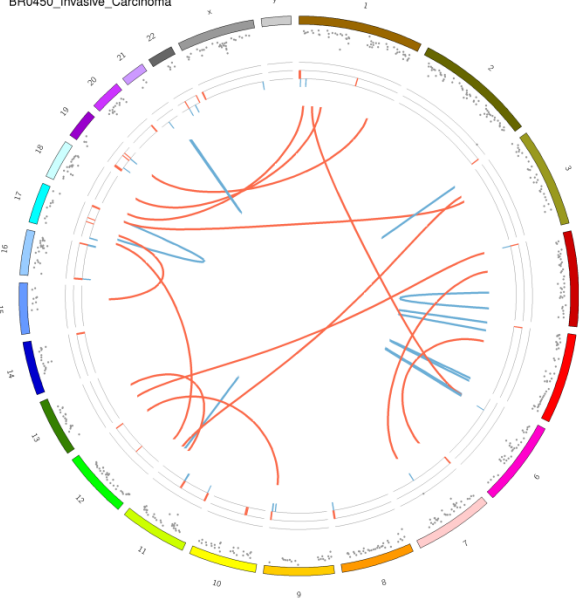

**g**

BR0556\_Invasive\_Carcinoma

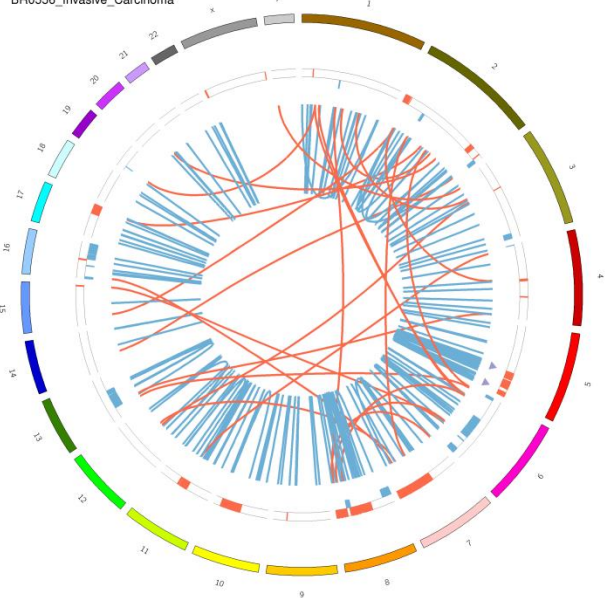

**h**

BR9013\_Mixed

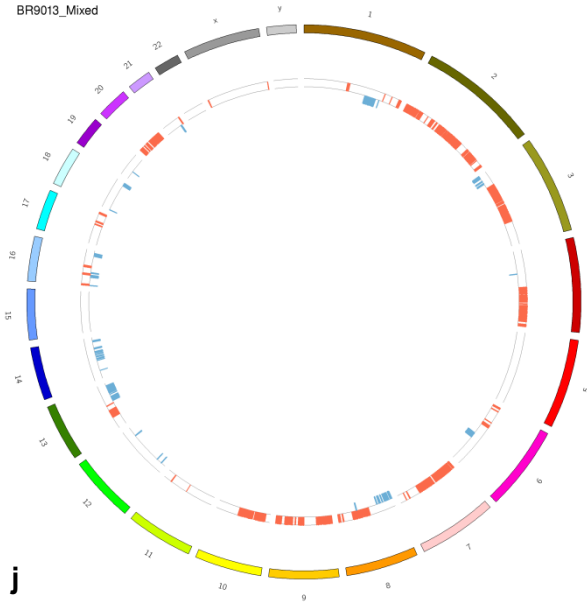**i**

BR9014\_Mixed

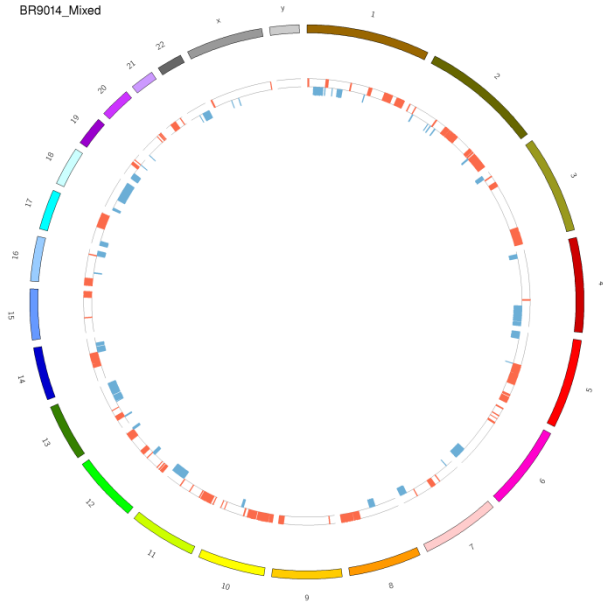**j**

BR9015\_Invasive\_Carcinoma

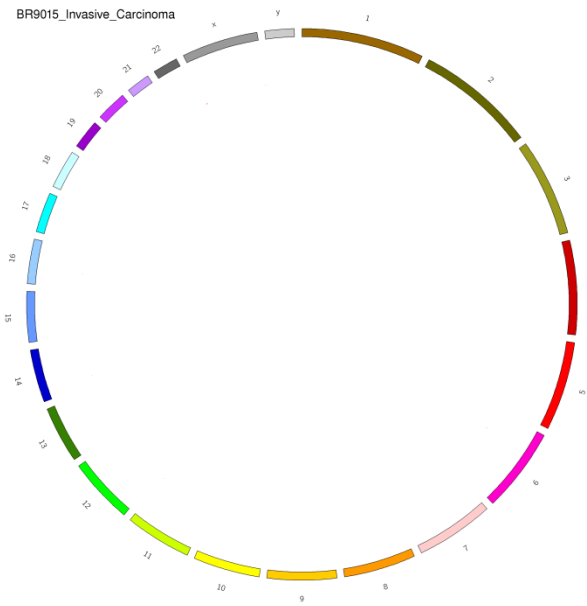**k**

BR9016\_Invasive\_Carcinoma

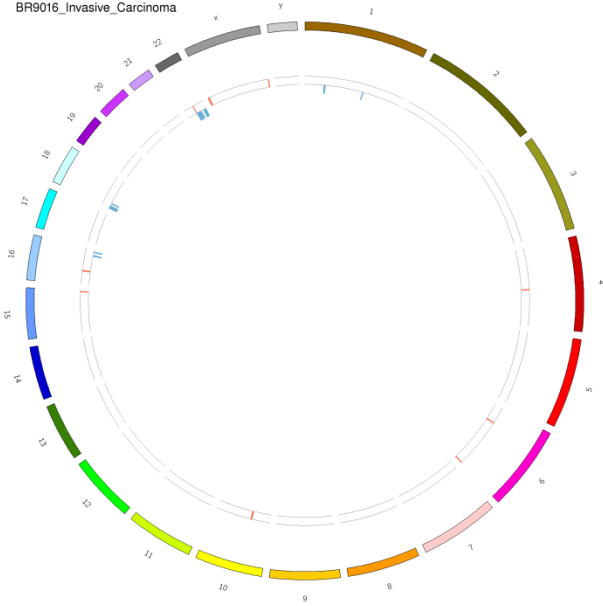

**l**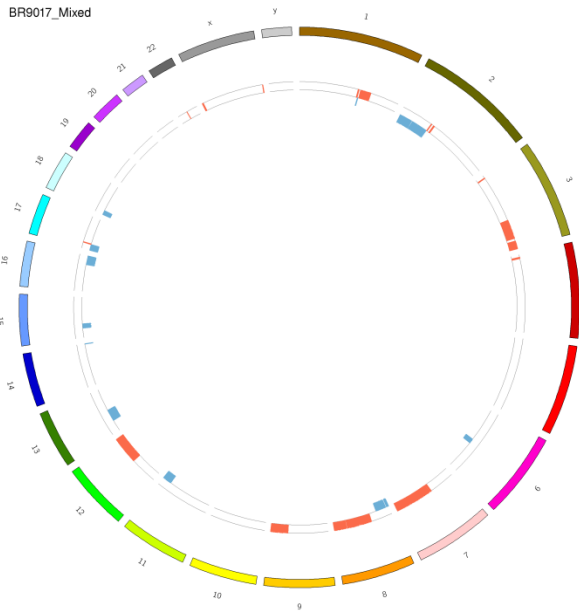**m**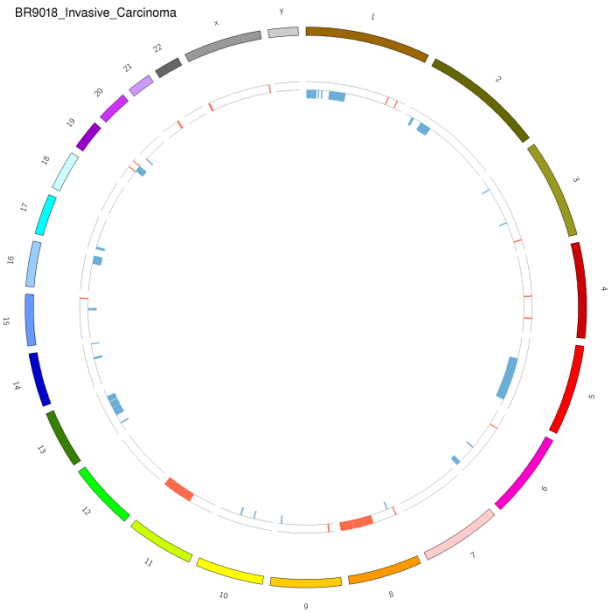

### Supplementary Figure 2 | Overall mutation profile of each tumour

**(a-m)** Circos plots indicate (from outside-in): chromosome number, scatterplot of SNV inter-mutational distance (distance of each somatic variant to the somatic variant adjacent to it), kataegis events (black indicates a significant hypermutation region, orange indicates that the hypermutation contains a C/TAG enrichment), CNAs (red indicates amplifications, blue indicates deletions), chromothripsis events (purple triangles), inter-chromosomal translocation (orange lines) and inversions (blue lines).

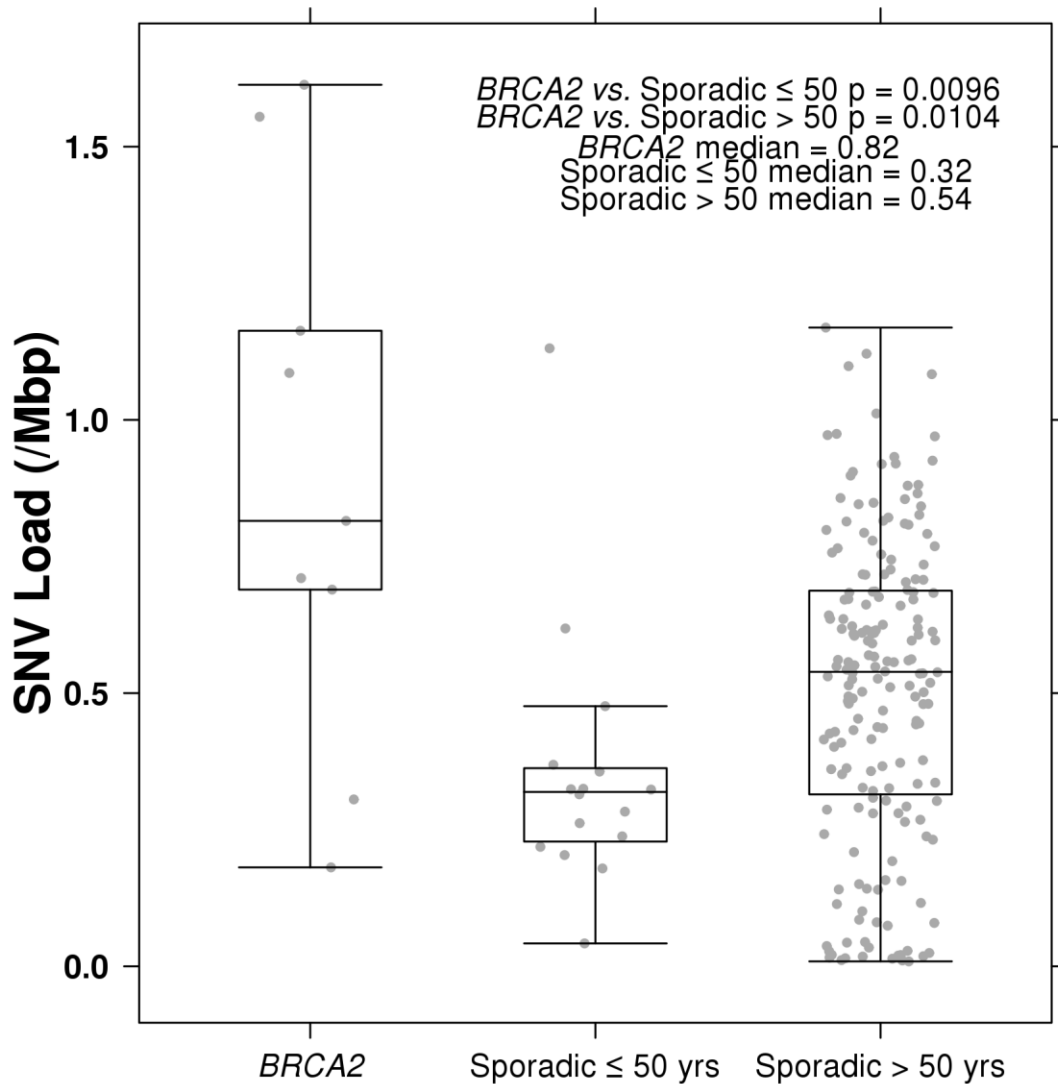

### Supplementary Figure 3 | SNV mutation density

SNV mutation density (somatic SNVs per mega-basepair of DNA sequenced) is compared between  $BRCA2$ -mutant PCa and sporadic PCa. Sporadic PCa are stratified by patient age at initial treatment. P-values were calculated using a Mann-Whitney U-test. Whiskers indicate the maximum and minimum values, the box outline indicates the third and first quartile and the bar indicates the mean.

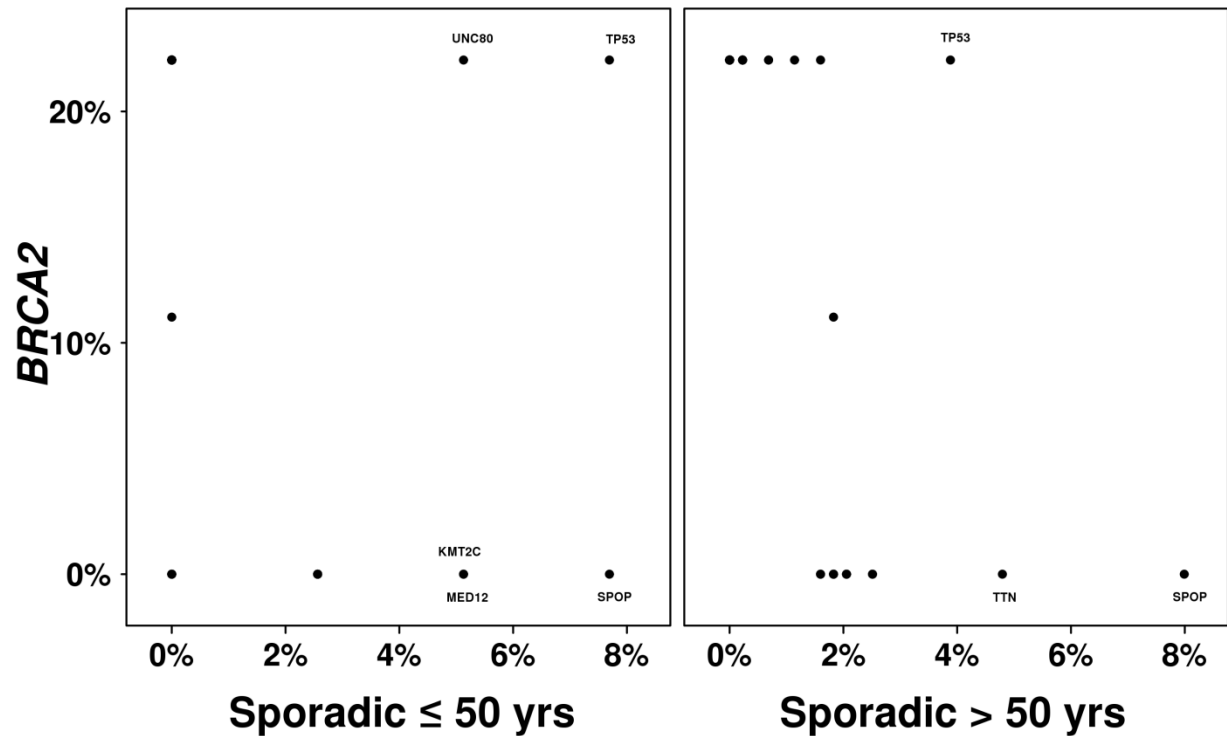

**Supplementary Figure 4 | Genes altered by SNVs in *BRCA2*-mutant and sporadic PCa**

Relative aberration frequencies of genes recurrently disrupted by SNVs in localized *BRCA2*-mutant (n = 9) vs. sporadic PCa (n = 477). Genes were considered recurrently altered if found in at least eight sporadic or two *BRCA2*-mutant specimens. Sporadic samples were split into two groups based on age at initial treatment; 50 years of age or younger (left) and older than 50 years of age (right). Some points are occupied by multiple genes with identical occurrence frequencies.



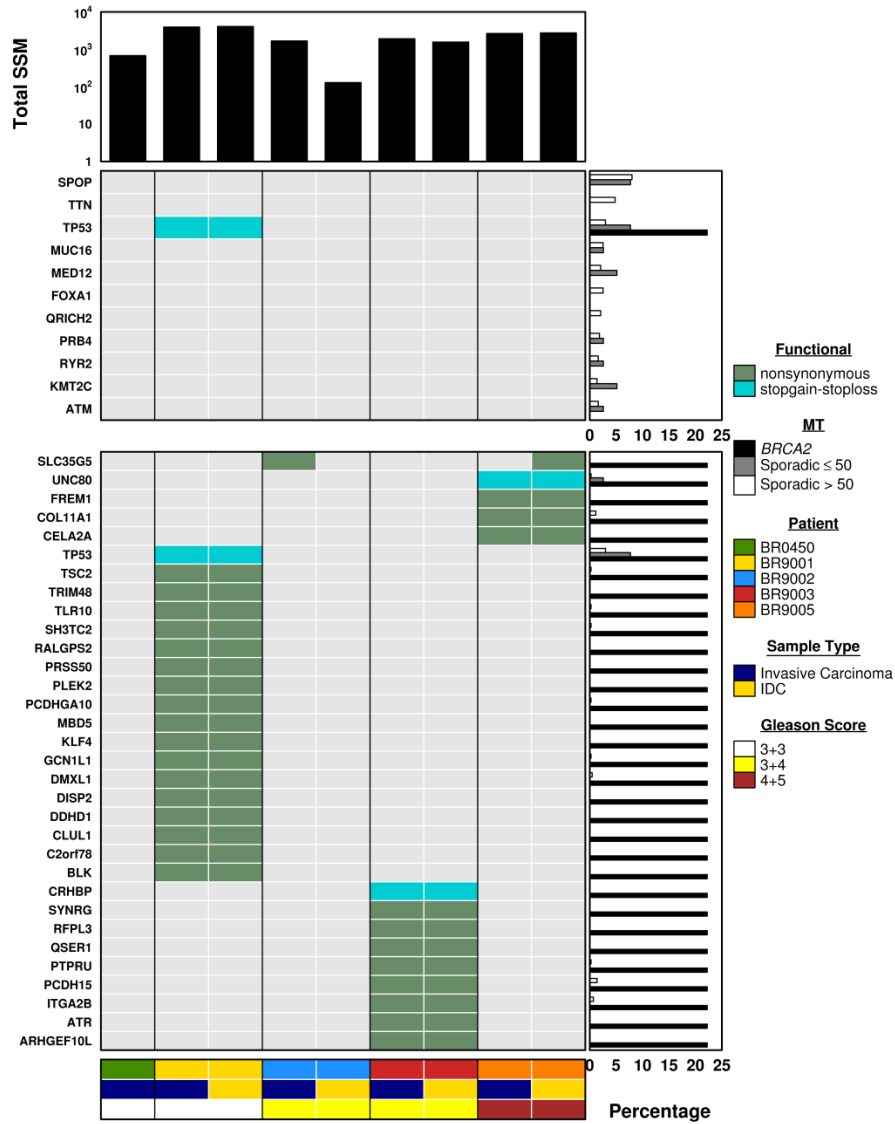

## Supplementary Figure 5 | Comparison of somatic SNV profile between *BRCA2*-mutant and sporadic PCa

Somatic SNV predictions in protein-coding regions from five *BRCA2*-mutant samples were compared to recurrently mutated genes in sporadic PCa (n = 477). The top barplot shows the total number of single nucleotide variants (SNV) per specimen. The central heatmap shows the recurrent somatic SNV predictions in the coding regions for the five *BRCA2*-mutant cancers. Tumours are sorted by patient id, sample type and Gleason score (bottom covariates). The top central heatmap shows overlap between the top 11 recurrently mutated genes, each found in at least eight specimens, detected in the sporadic cases and the recurrent genes found in the *BRCA2*-mutant cases. The percentage of recurrence found in sporadic cases 50 years of age or younger (n = 39), sporadic cases older than 50 years of age (n = 438), or in *BRCA2*-mutant cases are shown at the right side of each plot. Multiple foci from the same patient are indicated in the same patient covariate colour, where sample type colour indicates invasive carcinoma (IC) in dark blue and intraductal carcinoma (IDC) in yellow.

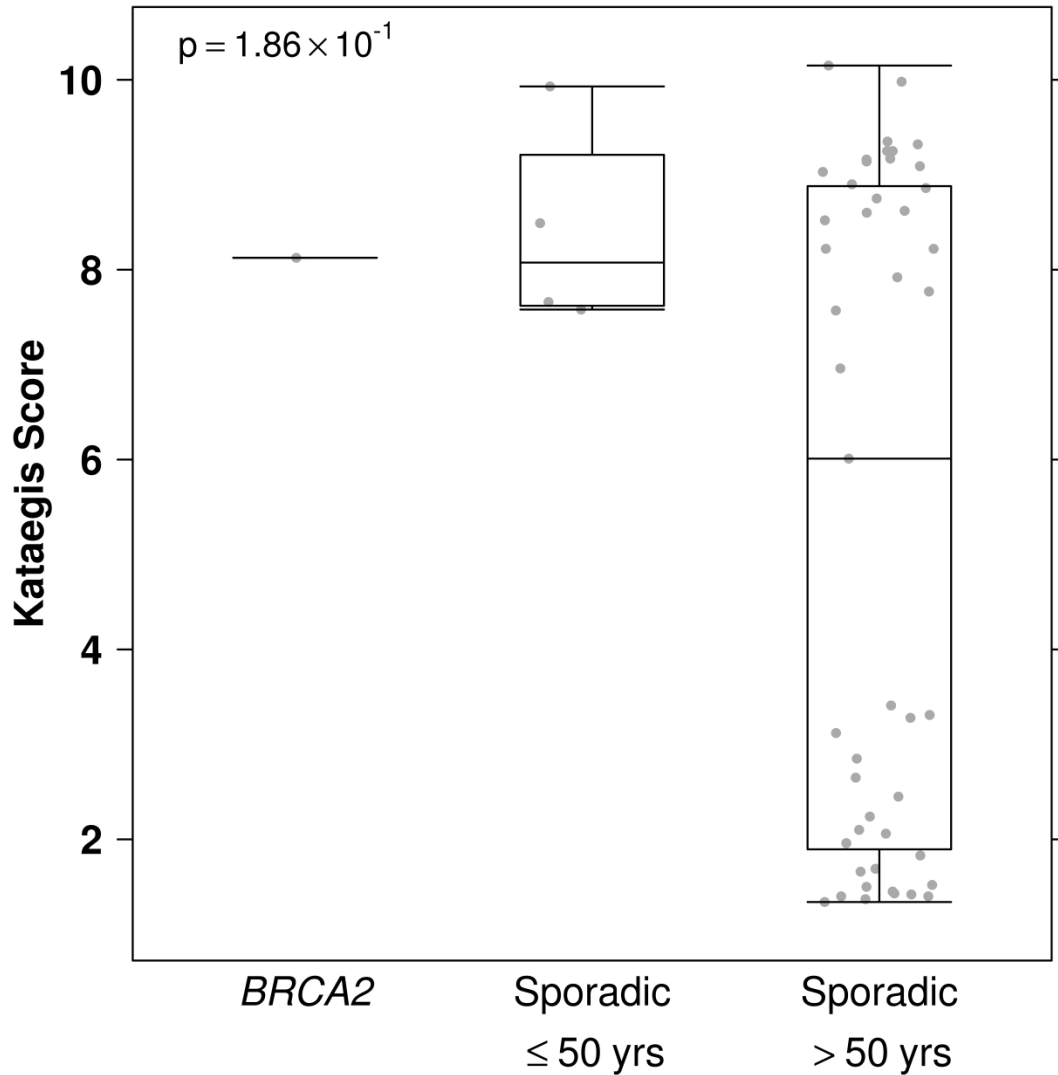

### Supplementary Figure 6 | Kataegis in *BRCA2*-mutant and sporadic PCa

Boxplot comparing kataegis scores, generated by SeqKat, between *BRCA2*-mutant (n=11) and sporadic (n=133) PCa specimens. Values are shown for specimens, only if a kataegis even was identified. P-value is from a one-way ANOVA. Whiskers indicate the maximum and minimum values, the box outline indicates the third and first quartile and the bar indicates the mean.

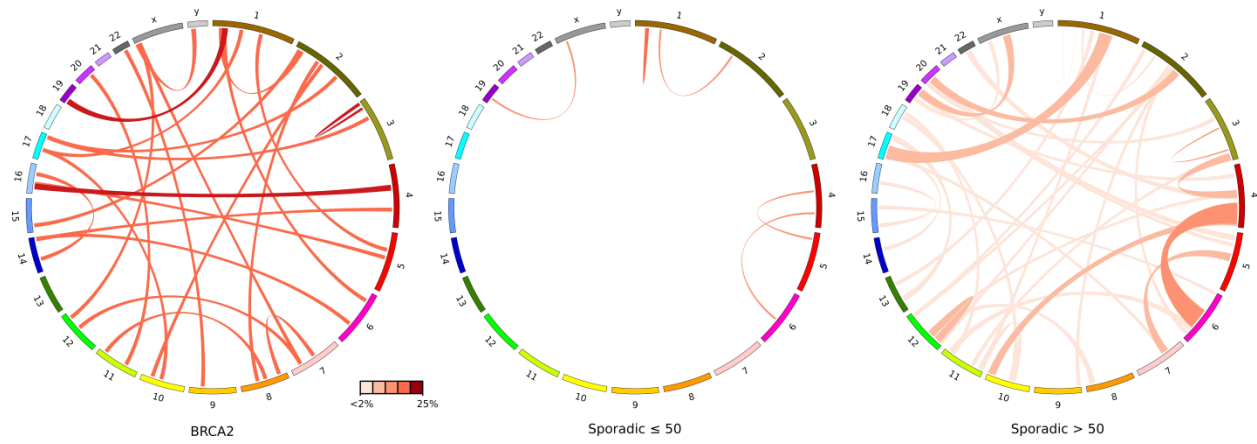

### Supplementary Figure 7 | Genomic rearrangements in *BRCA2*-mutant and sporadic PCa

Circos plots illustrating translocation and inversion events in *BRCA2*-mutant PCa (left) and sporadic PCa from men 50 years of age and younger (center) and men older than 50 years of age (right). The percentage of specimens the event was observed in is represented by the colour and thickness of the lines. Light red < 2%, dark red > 25%.

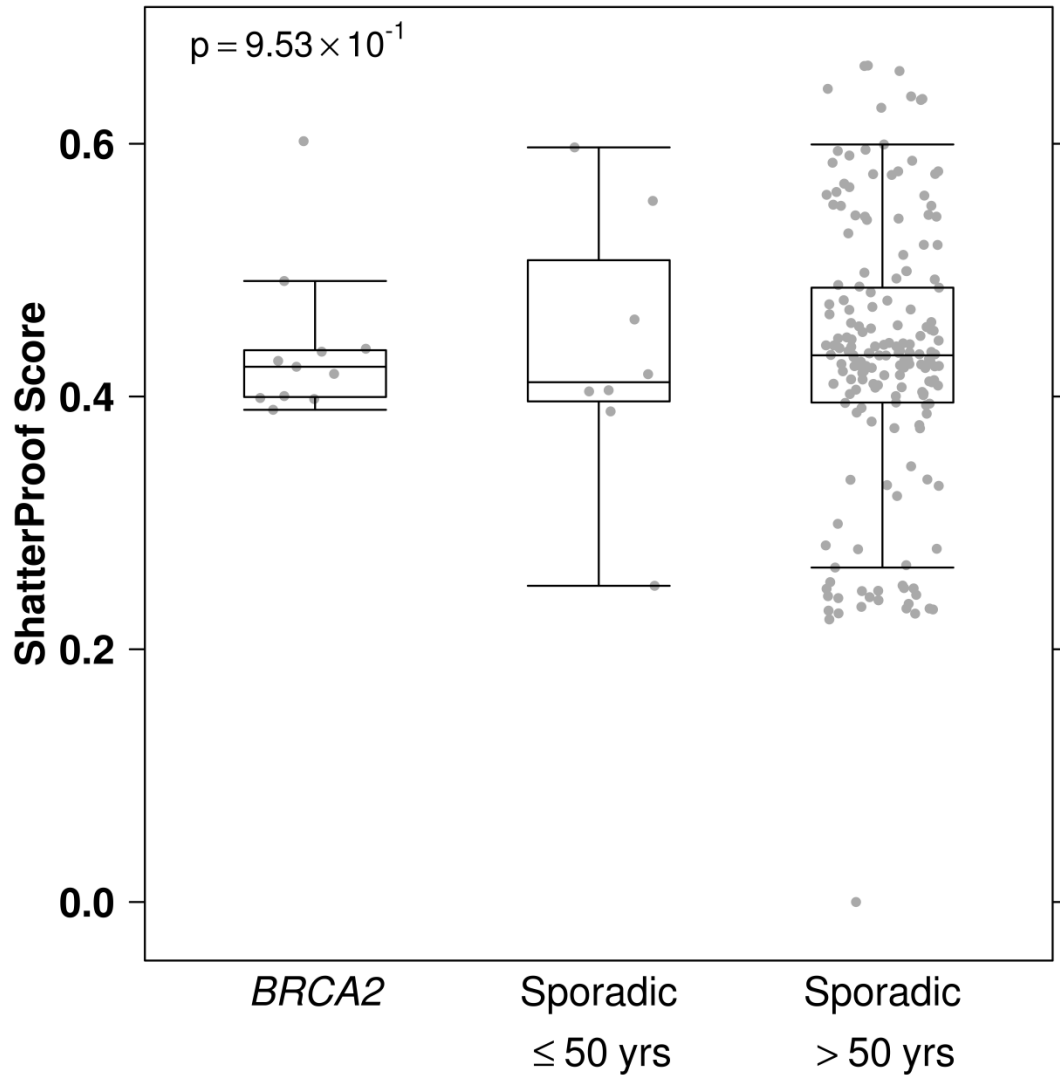

### Supplementary Figure 8 | Chromothripsis rates

Boxplot comparing chromothripsis scores, generated by ShatterProof, between *BRCA2*-mutant (n = 11) and sporadic (n = 133) PCa specimens. P-value is from a two-sided, unpaired t-test. Whiskers indicate the maximum and minimum values, the box outline indicates the third and first quartile and the bar indicates the mean.

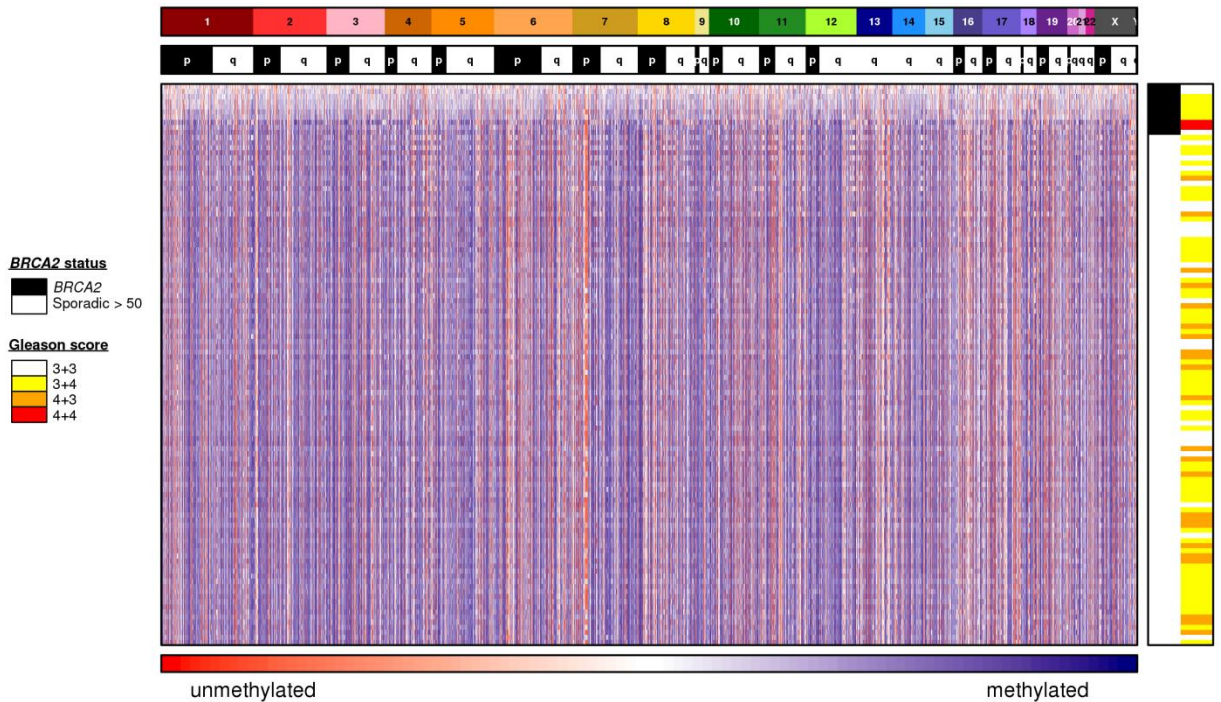

### Supplementary Figure 9 | Differentially methylated probes in *BRCA2*-mutant

Heatmap of 7,445 significantly ( $q\text{-value} < 0.05$ ,  $|\log_2 \beta\text{-FC}| > 0.1$ ) differentially methylated probes between *BRCA2*-mutant ( $n = 10$ ) and sporadic PCa ( $n = 100$ ) specimens. Red represents  $\beta$ -values closer to 0 (unmethylated) and blue represents  $\beta$ -values closer to 1 (methylated). Probes (columns) were sorted by chromosome location and cytoband. Specimens (rows) were sorted based on *BRCA2* genotype and the sum of  $\beta$ -value in increasing order. Gleason scores are shown for each specimen.

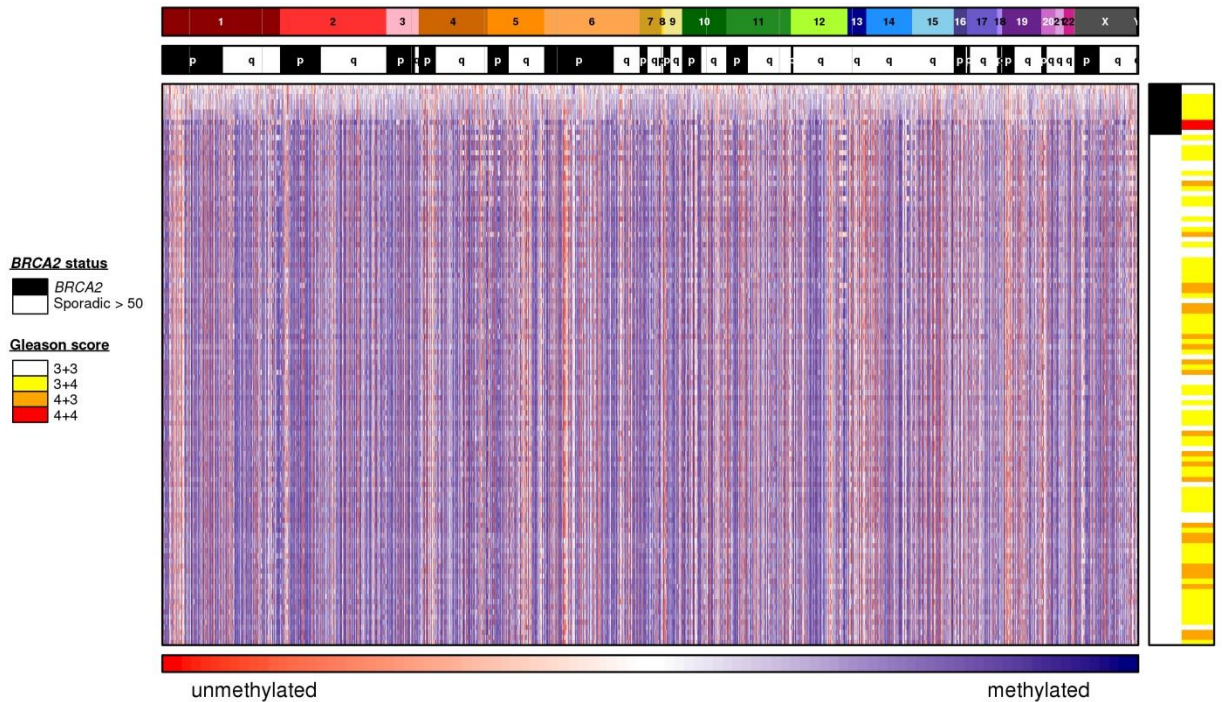

### Supplementary Figure 10 | Differentially methylated probes controlling for CNA differences in *BRCA2*-mutant PCa

Heatmap of 4,979 significantly ( $q\text{-value} < 0.05$ ,  $|\log_2 \beta\text{-FC}| > 0.1$ , CNA fraction  $< 0.1$ ) differentially methylated probes between *BRCA2*-mutant ( $n = 10$ ) and sporadic ( $n = 100$ ) specimens. Red represents  $\beta$ -values closer to 0 (unmethylated) and blue represents  $\beta$ -values closer to 1 (methylated). Probes (columns) were sorted by chromosome location and cytoband. Specimens (rows) were sorted based on *BRCA2* status and the sum of  $\beta$ -value in increasing order. Gleason score is also shown for each specimen.

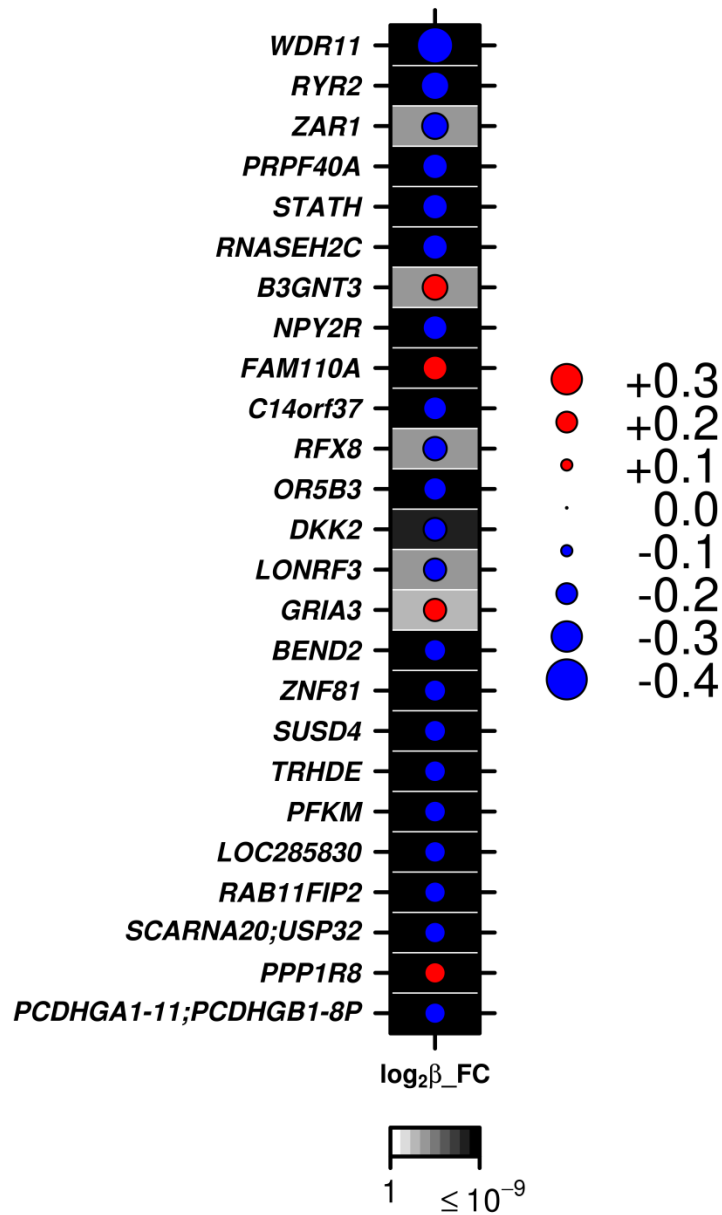

**Supplementary Figure 11 | Differentially methylated genes in *BRCA2*-mutant PCa**

A dotmap of the 25 most significantly differentially methylated genes between *BRCA2*-mutant and sporadic PCa, after controlling for CNA status. FDR values are represented by the shade of the gray boxes, and  $\log_2$  beta fold changes are indicated by the size of the circle within each box. The genes are ordered based on  $\log_2$  fold-change of the  $\beta$ -values.

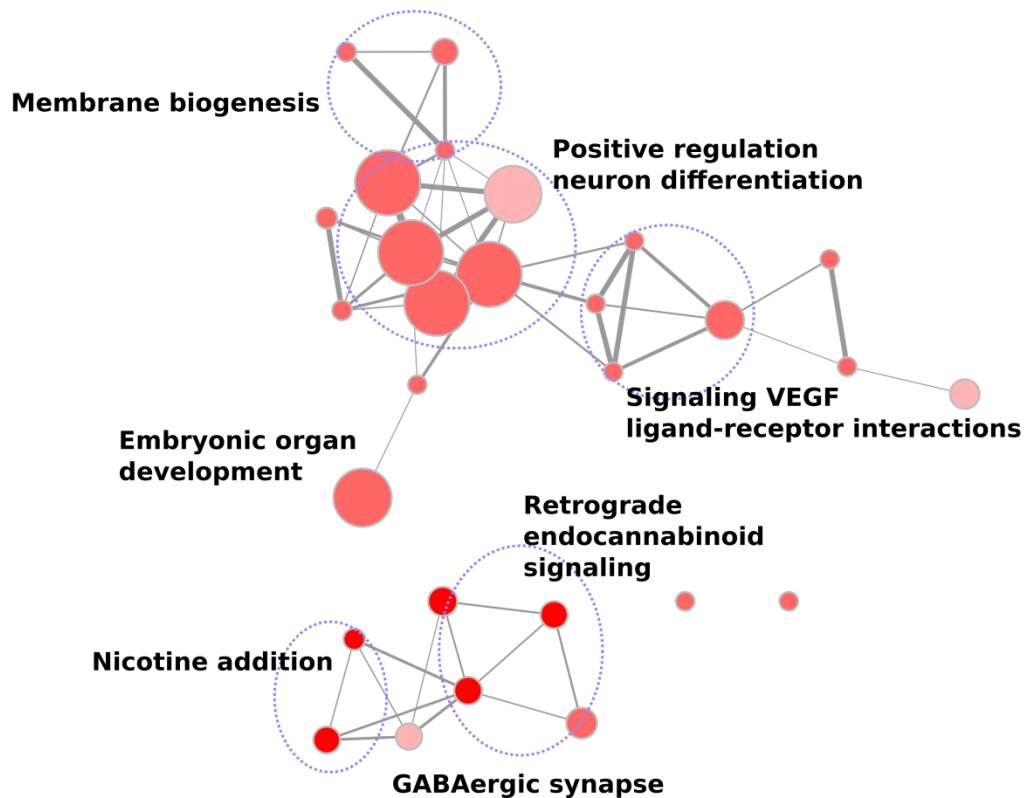

### Supplementary Figure 12 | Pathway analysis of differential methylation

Illustration of the enriched pathways ( $p < 0.05$ ) from g:Profiler analysis. Pathways were curated using gene ontology: biological process, KEGG and REACTOME. The outputs were visualized using the enrichment map in Cytoscape. Each node represents a gene-set, which is defined as a set of genes underlying a functional profile. Node size indicates the number of genes in the gene-set. Node colour represents significance of enrichment (hypergeometric test) from  $p = 8.25 \times 10^{-5}$  to  $p = 0.05$  (red to pink). Gene-sets are connected by a grey line if they share common genes, and line thickness reflects the number of overlapping genes. Gene-sets with similar functions are grouped together by purple dotted circles.



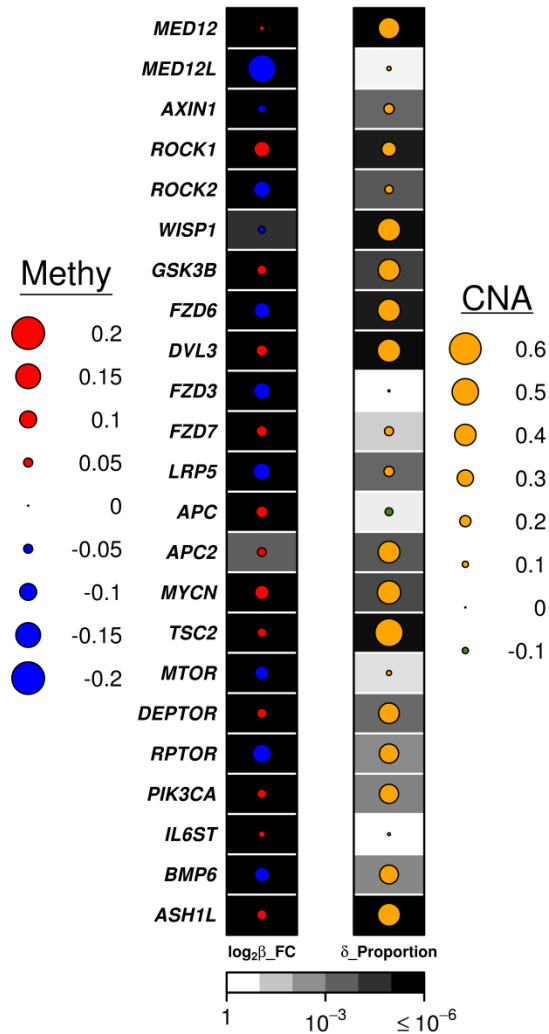

### Supplementary Figure 13 | Aberrant methylation and CNAs in NED associated pathways

Key neuroendocrine differentiation (NED) associated genes show either differential methylation or a different proportion of patients with a CNA in *BRCA2*-mutant PCa relative to sporadic PCa. The shading of the grey boxes represents q-values, ranging from 0 to 1. The size of the circle for methylation analysis (left) indicates log<sub>2</sub> beta fold change and for CNA analysis (right) it represents the difference in the proportion of patients with CNA in *BRCA2*-mutant vs. sporadic PCa.

**a**

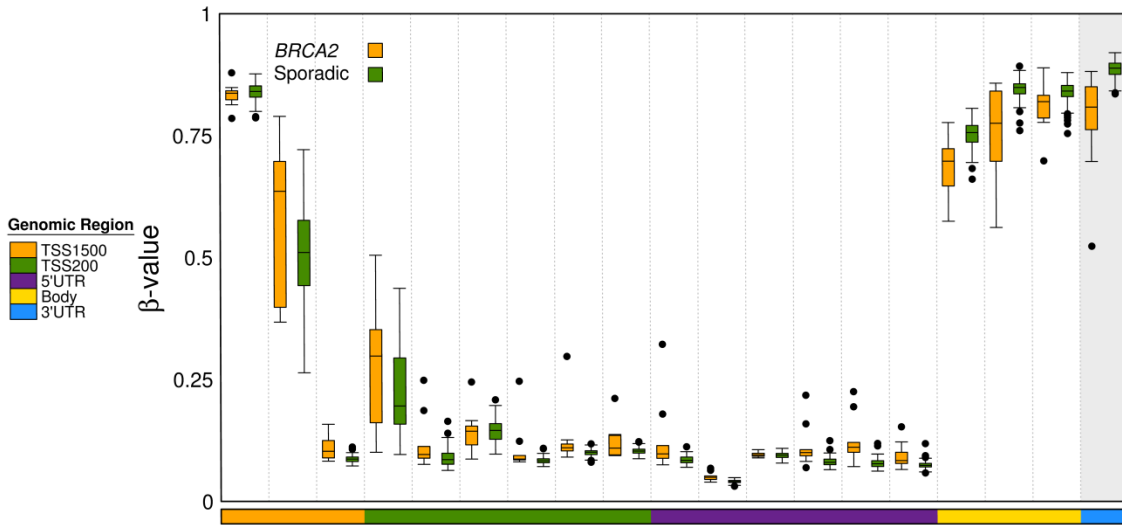

**b**

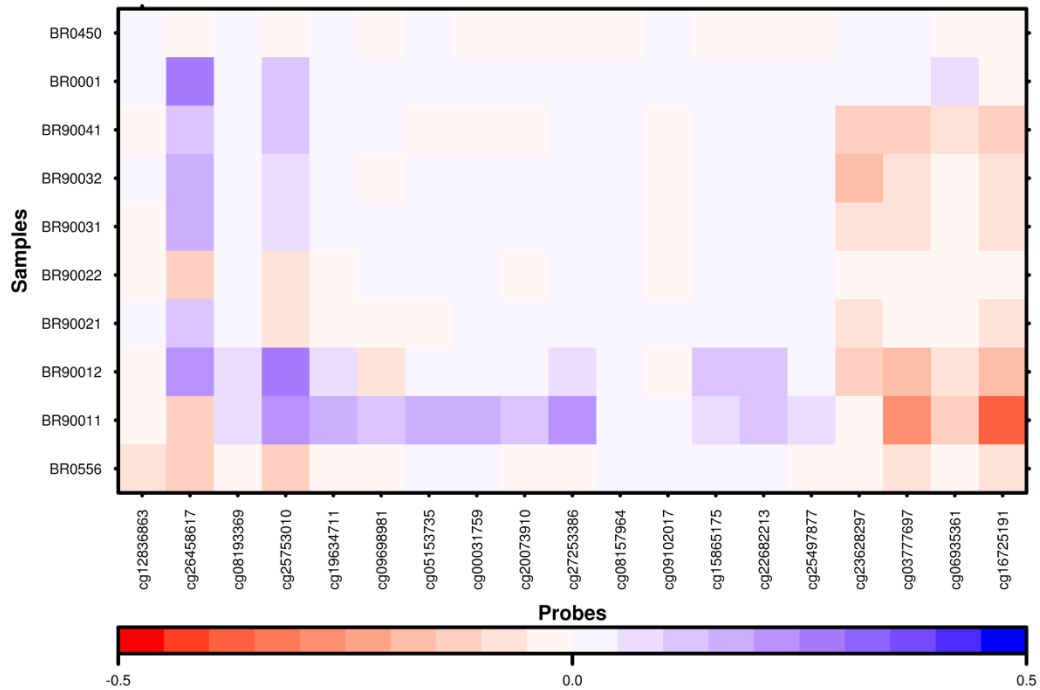

### Supplementary Figure 14 | Comparative methylation of the *BRCA2* locus

(a)  $\beta$ -values (y-axis) of probes within the *BRCA2* locus for patients with *BRCA2*-mutant ( $n=10$ ) and sporadic PCa ( $n = 100$ ). Probes are sorted by genomic region. Those in grey were significantly differentially methylated ( $q < 0.05$ ,  $|\log_2 \text{FoldChange}| > 0.1$ ). (b) Heatmap of relative methylation  $\beta$ -values for *BRCA2*-mutant vs. the mean of sporadic PCa for probes shown in (a).

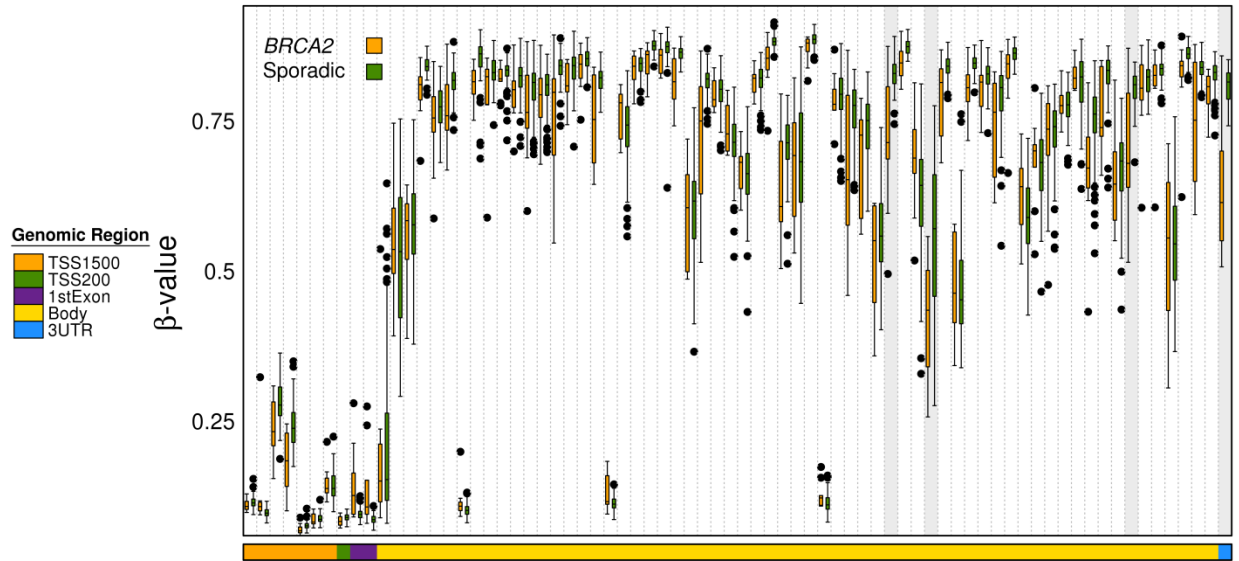

### Supplementary Figure 15 | Aberrant methylation in *MED12L*

*MED12L* is hypomethylated in *BRCA2*-mutant PCa.  $\beta$ -values (y-axis) of patients with ( $n=10$ ) and without *BRCA2*-mutations ( $n = 100$ ) are shown. Probes highlighted in grey were shown to be significantly differentially methylated ( $q < 0.05$ ,  $|\log_2 \beta\text{-FC}| > 0.1$ ). Probes were sorted based on genomic region (TSS1500, TSS200, 1st Exon, gene body and 3' UTR).

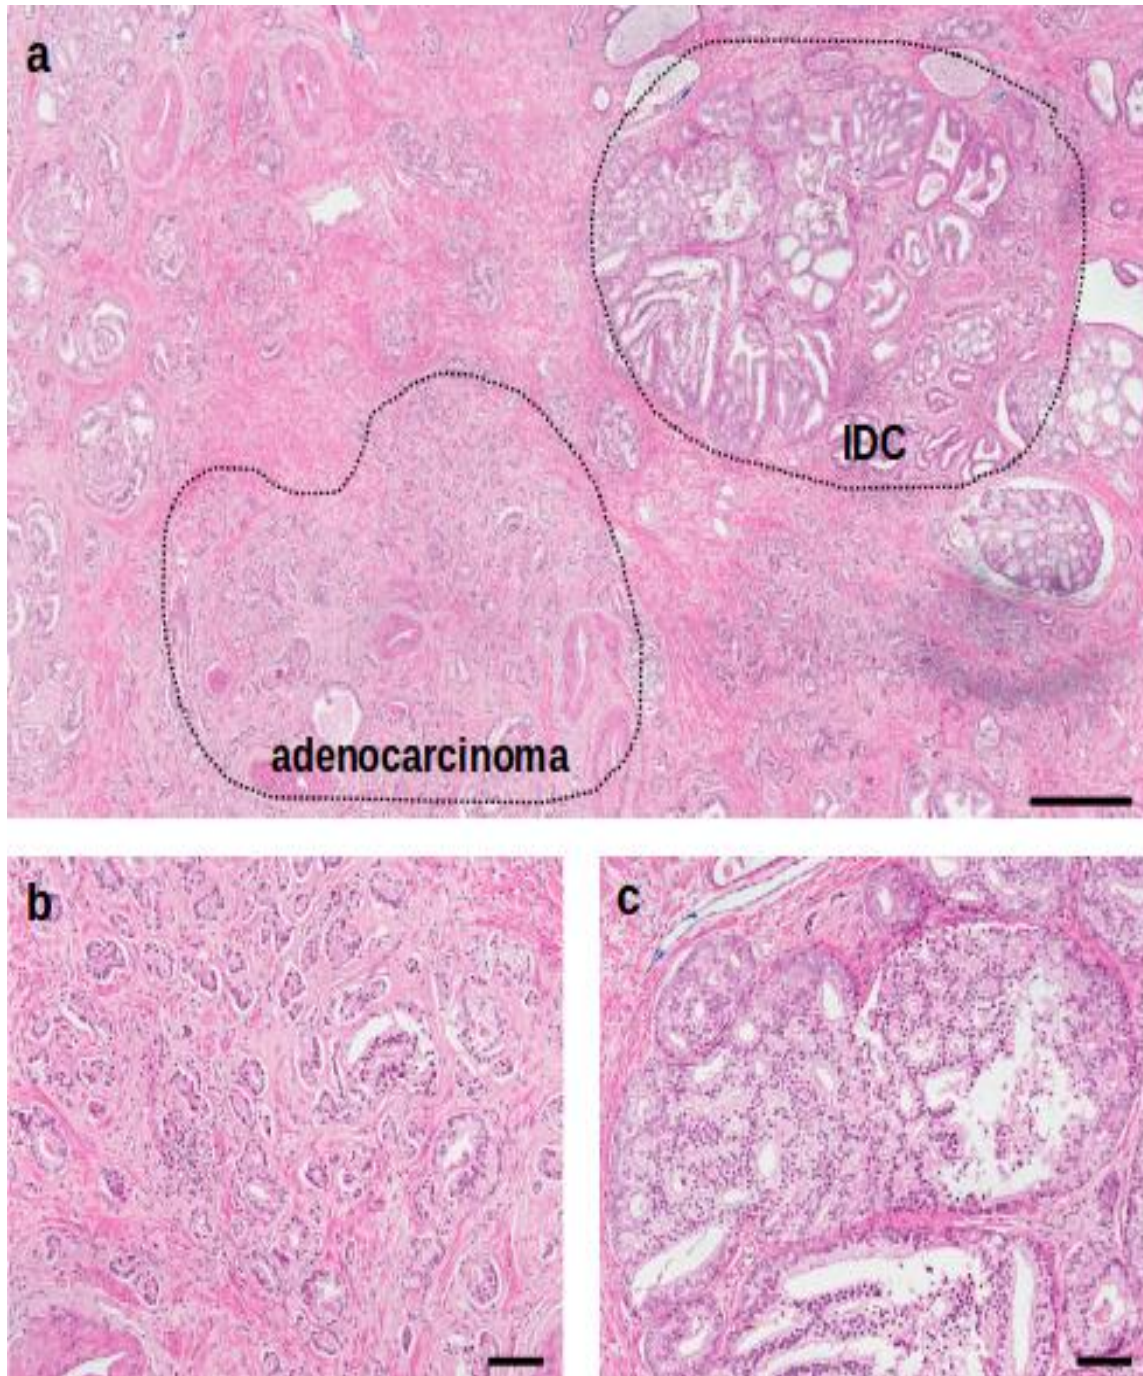

### Supplementary Figure 16 | Histology of intraductal carcinoma of the prostate

(a) Low magnification image of haematoxylin and eosin stained tissue from patient BR9003 showing prominent areas of adenocarcinoma and IDC. (b,c) Higher magnification images of the regions of (b) Gleason 3+4 adenocarcinoma and (c) IDC. Individual areas such as (b) and (c) were marked by a pathologist and micro-dissected from FFPE tissues for collection of DNA. Scale bar (a) 500  $\mu\text{m}$  and (b, c) 100  $\mu\text{m}$ .

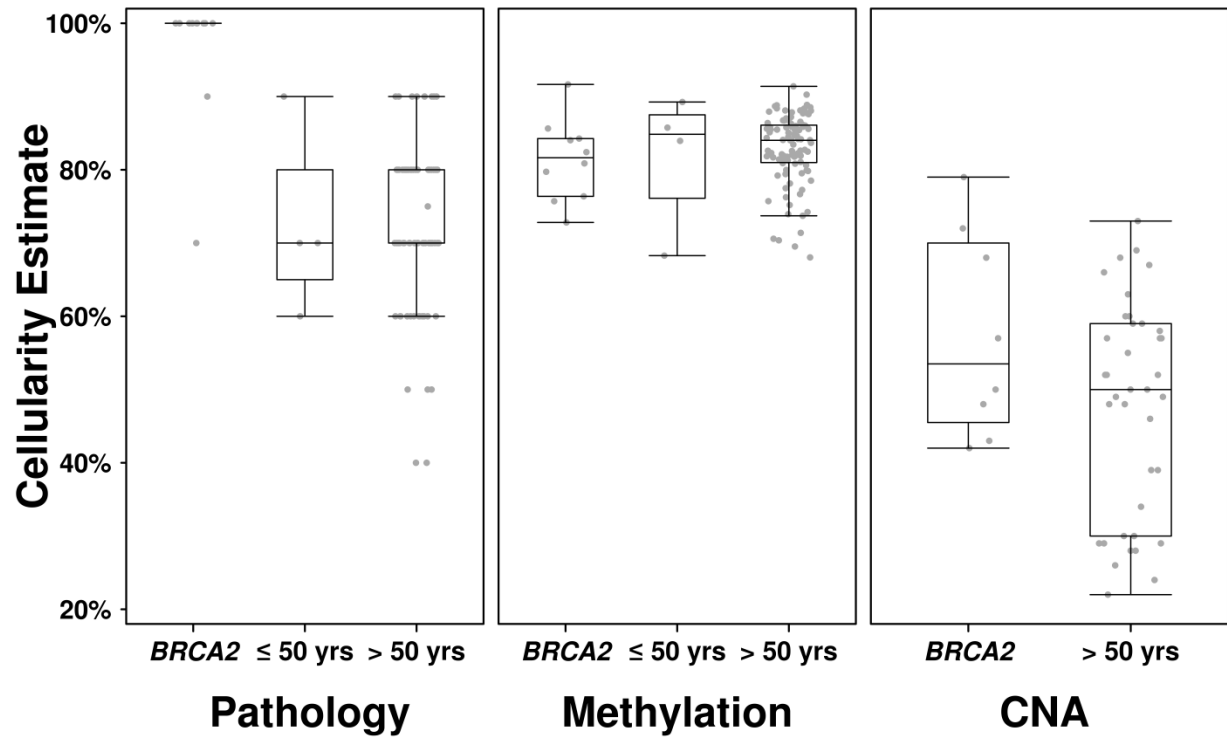

### Supplementary Figure 17 | Cellularity comparisons

Cellularity estimates in specimens from *BRCA2*-mutant and sporadic PCa derived from pathology, methylation and CNAs. Sporadic specimens were stratified by age at initial treatment. Whiskers indicate the maximum and minimum values, the box outline indicates the third and first quartile and the bar indicates the mean.

| Patient ID    | Tumour/Germline | Tissue Type                | Coverage | Lanes Sequenced | Aligned Reads |
|---------------|-----------------|----------------------------|----------|-----------------|---------------|
| <b>BR9001</b> | Tumour          | Invasive Carcinoma         | 39.74X   | 5               | 2381648692    |
|               | Tumour          | Intraductal Carcinoma      | 46.24X   | 4               | 1863118468    |
|               | Germline        | Benign Prostate Epithelium | 41.15X   | 6               | 2663539137    |
| <b>BR9002</b> | Tumour          | Intraductal Carcinoma      | 51.13X   | 4               | 1764713863    |
|               | Germline        | Whole Blood                | 47.23X   | 4               | 1647630156    |
|               | Tumour          | Invasive Carcinoma         | 42.43X   | 4               | 1742662384    |
| <b>BR9003</b> | Tumour          | Intraductal Carcinoma      | 41.56X   | 4               | 1963330346    |
|               | Germline        | Whole Blood                | 49.62X   | 4               | 1738170310    |
|               | Tumour          | Invasive Carcinoma         | 51.60X   | 4               | 1808253685    |
| <b>BR9004</b> | Tumour          | Invasive Carcinoma         | 41.42X   | 4               | 1832673119    |
|               | Tumour          | Intraductal Carcinoma      | 45.11X   | 4               | 1824591030    |
| <b>BR9005</b> | Tumour          | Invasive Carcinoma         | 45.44X   | 4               | 1706563103    |
|               | Tumour          | Intraductal Carcinoma      | 36.09X   | 4               | 1476458935    |
|               | Germline        | Whole Blood                | 48.80X   | 4               | 1754897689    |
| <b>BR9013</b> | Tumour          | Gross Tumour               |          |                 |               |
| <b>BR9014</b> | Tumour          | Gross Tumour               |          |                 |               |
| <b>BR9015</b> | Tumour          | Gross Tumour               |          |                 |               |
| <b>BR9016</b> | Tumour          | Gross Tumour               |          |                 |               |
| <b>BR9017</b> | Tumour          | Gross Tumour               |          |                 |               |
| <b>BR9018</b> | Tumour          | Gross Tumour               |          |                 |               |
| <b>BR0001</b> | Tumour          | Gross Tumour               |          |                 |               |
| <b>BR0450</b> | Tumour          | Invasive Carcinoma         | 60.42X   | 7               | 2276150296    |
|               | Germline        | Whole Blood                | 41.42X   | 4               | 1344879117    |
| <b>BR0556</b> | Tumour          | Invasive Carcinoma         | 21.37X   | 3               | 728101594     |
| <b>SP0100</b> | Tumour          | Intraductal Carcinoma      | 29.75X   | 8               | 1396659680    |
|               | Tumour          | Invasive Carcinoma         | 39.44X   | 9               | 1693161504    |
|               | Germline        | Whole Blood                | 48.93X   | 4               | 1606069684    |
| <b>SP0196</b> | Tumour          | Intraductal Carcinoma      | 69.09X   | 6               | 2417472778    |

|               |          |                       |        |   |            |
|---------------|----------|-----------------------|--------|---|------------|
|               | Tumour   | Invasive Carcinoma    | 62.24X | 6 | 2037313683 |
|               | Germline | Whole Blood           | 42.28X | 4 | 1435208636 |
| <b>SP0260</b> | Tumour   | Intraductal Carcinoma | 41.45X | 6 | 2081634607 |
|               | Tumour   | Invasive Carcinoma    | 48.47X | 6 | 2377641079 |
|               | Germline | Whole Blood           | 36.96X | 4 | 1270011652 |
| <b>SP0334</b> | Tumour   | Intraductal Carcinoma | 38.13X | 6 | 2032242648 |
|               | Tumour   | Invasive Carcinoma    | 44.16X | 6 | 2210749123 |
|               | Germline | Whole Blood           | 35.06X | 3 | 1135742587 |
| <b>SP0361</b> | Tumour   | Intraductal Carcinoma | 59.90X | 6 | 2453981151 |
|               | Tumour   | Invasive Carcinoma    | 39.37X | 6 | 2644949400 |
|               | Germline | Whole Blood           | 45.49X | 3 | 1474565417 |
| <b>SP0364</b> | Tumour   | Intraductal Carcinoma | 41.07X | 6 | 1784739292 |
|               | Tumour   | Invasive Carcinoma    | 33.97X | 6 | 1876753050 |
|               | Germline | Whole Blood           | 44.65X | 3 | 1438418976 |

| Patient ID    | # Somatic SNVs UTR | # Somatic Non-synonymous SNVs | # Somatic Splicing SNVs | # Somatic Stopgain-loss SNVs | # Somatic Synonymous SNVs | Total Somatic SNVs (Post Filter) |
|---------------|--------------------|-------------------------------|-------------------------|------------------------------|---------------------------|----------------------------------|
| <b>BR9001</b> | 26                 | 28                            | 0                       | 2                            | 7                         | 3946                             |
|               | 25                 | 26                            | 0                       | 2                            | 6                         | 4081                             |
| <b>BR9002</b> | 0                  | 0                             | 0                       | 0                            | 1                         | 129                              |
|               | 12                 | 10                            | 0                       | 1                            | 1                         | 1677                             |
| <b>BR9003</b> | 12                 | 10                            | 0                       | 1                            | 6                         | 1562                             |
|               | 16                 | 12                            | 0                       | 1                            | 5                         | 1921                             |
| <b>BR9004</b> |                    |                               |                         |                              |                           |                                  |
| <b>BR9005</b> | 23                 | 17                            | 1                       | 2                            | 0                         | 2654                             |
|               | 22                 | 16                            | 0                       | 3                            | 2                         | 2751                             |
| <b>BR9013</b> |                    |                               |                         |                              |                           |                                  |
| <b>BR9014</b> |                    |                               |                         |                              |                           |                                  |
| <b>BR9015</b> |                    |                               |                         |                              |                           |                                  |

|               |          |          |          |          |          |            |
|---------------|----------|----------|----------|----------|----------|------------|
| <b>BR9016</b> |          |          |          |          |          |            |
| <b>BR9017</b> |          |          |          |          |          |            |
| <b>BR9018</b> |          |          |          |          |          |            |
| <b>BR0001</b> |          |          |          |          |          |            |
| <b>BR0450</b> | <b>2</b> | <b>5</b> | <b>0</b> | <b>0</b> | <b>5</b> | <b>679</b> |
| <b>BR0556</b> |          |          |          |          |          |            |
| <b>SP0100</b> | 27       | 15       | 0        | 0        | 7        | 3636       |
|               | 37       | 17       | 0        | 0        | 8        | 4984       |
| <b>SP0196</b> | 17       | 19       | 2        | 2        | 6        | 2463       |
|               | 12       | 11       | 1        | 1        | 5        | 1718       |
| <b>SP0260</b> | 9        | 16       | 1        | 1        | 7        | 2152       |
|               | 7        | 17       | 1        | 1        | 8        | 1837       |
| <b>SP0334</b> | 13       | 12       | 0        | 0        | 4        | 1817       |
|               | 11       | 10       | 0        | 1        | 4        | 1716       |
| <b>SP0361</b> | 20       | 13       | 0        | 0        | 3        | 1669       |
|               | 12       | 12       | 0        | 2        | 10       | 1317       |
| <b>SP0364</b> | 20       | 18       | 0        | 2        | 12       | 2818       |
|               | 17       | 21       | 0        | 2        | 9        | 2684       |

| <b>Patient ID</b> | <b>Deletion</b> | <b>Inversions</b> | <b>Duplication</b> | <b>Translocation</b> | <b>Total GRs</b> | <b>Shatter-Proof Score</b> |
|-------------------|-----------------|-------------------|--------------------|----------------------|------------------|----------------------------|
| <b>BR9001</b>     | 1               | 1                 | 0                  | 5                    | 7                | 0.43779                    |
|                   | 1               | 4                 | 0                  | 3                    | 8                | 0.39884                    |
| <b>BR9002</b>     | 2               | 2                 | 1                  | 14                   | 19               | 0.40035                    |
|                   | 8               | 7                 | 2                  | 8                    | 25               | 0.42354                    |



|               |     |    |     |    |     |         |
|---------------|-----|----|-----|----|-----|---------|
| <b>BR9003</b> | 5   | 0  | 7   | 16 | 28  | 0.43547 |
|               | 12  | 2  | 7   | 20 | 41  | 0.38948 |
| <b>BR9004</b> | 20  | 17 | 10  | 58 | 105 | 0.41792 |
|               | 25  | 21 | 16  | 64 | 126 | 0.49139 |
| <b>BR9005</b> | 14  | 5  | 4   | 5  | 28  | 0.42815 |
|               | 20  | 8  | 4   | 10 | 42  | NA      |
| <b>BR9013</b> |     |    |     |    |     |         |
| <b>BR9014</b> |     |    |     |    |     |         |
| <b>BR9015</b> |     |    |     |    |     |         |
| <b>BR9016</b> |     |    |     |    |     |         |
| <b>BR9017</b> |     |    |     |    |     |         |
| <b>BR9018</b> |     |    |     |    |     |         |
| <b>BR0001</b> |     |    |     |    |     |         |
| <b>BR0450</b> | 2   | 6  | 2   | 13 | 23  | 0.39802 |
| <b>BR0556</b> | 104 | 47 | 42  | 25 | 218 | 0.60204 |
| <b>SP0100</b> | 172 | 19 | 120 | 13 | 324 |         |
|               | 230 | 21 | 290 | 17 | 558 |         |
| <b>SP0196</b> | 51  | 31 | 32  | 8  | 122 |         |
|               | 38  | 27 | 38  | 8  | 111 |         |
| <b>SP0260</b> | 47  | 48 | 34  | 31 | 160 |         |
|               | 45  | 41 | 31  | 30 | 147 |         |
| <b>SP0334</b> | 23  | 9  | 8   | 10 | 50  |         |
|               | 21  | 8  | 5   | 12 | 46  |         |
| <b>SP0361</b> | 23  | 17 | 10  | 14 | 64  |         |
|               | 27  | 14 | 17  | 13 | 71  |         |

|               |    |    |   |    |    |
|---------------|----|----|---|----|----|
| <b>SP0364</b> | 12 | 15 | 9 | 10 | 46 |
|               | 12 | 16 | 8 | 11 | 47 |

| Patient ID    | T2E                             | Gleason Score | PSA  | T Category | BRCA2 Genotype       | Mutation Effect | ENIGMA Classification |
|---------------|---------------------------------|---------------|------|------------|----------------------|-----------------|-----------------------|
| <b>BR9001</b> |                                 | 3+3           | N/A  | pT3a       | c.7757G>A            | Stop Gain       | Class 5 - Pathogenic  |
| <b>BR9002</b> |                                 | 3+4           | 5.8  | pT2c       | c.778_779delG<br>A   | Frameshift      | Class 5 - Pathogenic  |
| <b>BR9003</b> |                                 | 3+4           | 5    | pT3a       | c.5279C>G            | Stop Gain       | Class 5 - Pathogenic  |
|               | DEL;<br>chr21:39835082-42874898 |               |      |            |                      |                 |                       |
| <b>BR9004</b> |                                 | 4+5           | 3.4  | pT3a       | c.8585dupT           | Frameshift      | Class 5 - Pathogenic  |
|               | INV;<br>chr21:39869852-42869523 |               |      |            |                      |                 |                       |
| <b>BR9005</b> |                                 | 4+5           | 5.2  | pT3a       | c.9294C>G            | Stop Gain       | Class 5 - Pathogenic  |
| <b>BR9013</b> |                                 | 5+5           | 2    | pT3a       | c.5073dupA           | Frameshift      | Class 5 - Pathogenic  |
| <b>BR9014</b> |                                 | 5+5           | 0.4  | T3b        | c.8297delC           | Frameshift      | Class 5 - Pathogenic  |
| <b>BR9015</b> |                                 | 4+3           | 21   | T2b        | c.9154C>T            | Missense        | Class 5 - Pathogenic  |
| <b>BR9016</b> |                                 | 4+3           | 5.3  | T3a        | c.9117G>A            | Frameshift      | Class 5 - Pathogenic  |
| <b>BR9017</b> |                                 | 4+5           | 9.4  | T2c        | c.5946delT           | Frameshift      | Class 5 - Pathogenic  |
| <b>BR9018</b> |                                 | 4+3           | 3.4  | T3c        | c.3847_3848d<br>elGT | Frameshift      | Class 5 - Pathogenic  |
| <b>BR0001</b> |                                 | 4+4           | 9.79 | T1c        | c.6174delT           | Frameshift      | Class 5 - Pathogenic  |

|               |                             |     |       |     |            |            |                      |
|---------------|-----------------------------|-----|-------|-----|------------|------------|----------------------|
| <b>BR0450</b> | DEL;chr21:39906213-42875068 | 3+3 | 3.03  | T1c | c.5946delT | Frameshift | Class 5 - Pathogenic |
| <b>BR0556</b> |                             | 4+4 | 28.71 | T3a | c.5946delT | Frameshift | Class 5 - Pathogenic |
| <b>SP0100</b> |                             | 4+5 | 5.56  | T2a |            |            |                      |
| <b>SP0196</b> |                             | 4+3 | 4.88  | T2b |            |            |                      |
| <b>SP0260</b> |                             | 4+3 | 6.59  | T2a |            |            |                      |
| <b>SP0334</b> |                             | 3+4 | 7.41  | T2a |            |            |                      |
| <b>SP0361</b> |                             | 3+4 | 4.6   | T2a |            |            |                      |
| <b>SP0364</b> |                             | 3+3 | 8.11  | T2b |            |            |                      |

| Patient ID    | Number of Tumour Specimens | IDC-P? | Germline DNA Available? | Methylation Data Available ? | BRCA2 Promoter Methylation Status |
|---------------|----------------------------|--------|-------------------------|------------------------------|-----------------------------------|
| <b>BR9001</b> | 2                          | Yes    | Yes                     | Yes<br>Yes<br>No             | Hyper<br>Hyper<br>N/A             |
| <b>BR9002</b> | 2                          | Yes    | Yes                     | Yes<br>No<br>Yes             | Hypo<br>N/A<br>Hyper              |
| <b>BR9003</b> | 2                          | Yes    | Yes                     | Yes<br>No<br>Yes             | Hyper<br>N/A<br>Hyper             |
| <b>BR9004</b> | 2                          | Yes    | No                      | Yes<br>No                    | Hyper<br>N/A                      |
| <b>BR9005</b> | 2                          | Yes    | Yes                     | No<br>No                     | N/A<br>N/A                        |

|               |   |     |     |                |             |
|---------------|---|-----|-----|----------------|-------------|
|               |   |     |     | No             | N/A         |
| <b>BR9013</b> | 1 | Yes | Yes | No             | N/A         |
| <b>BR9014</b> | 1 | Yes | No  | No             | N/A         |
| <b>BR9015</b> | 1 | No  | Yes | No             | N/A         |
| <b>BR9016</b> | 1 | No  | Yes | No             | N/A         |
| <b>BR9017</b> | 1 | Yes | Yes | No             | N/A         |
| <b>BR9018</b> | 1 | No  | Yes | No             | N/A         |
| <b>BR0001</b> | 1 | No  | No  | Yes            | Hyper       |
| <b>BR0450</b> | 1 | No  | Yes | Yes<br>No      | Hypo<br>N/A |
| <b>BR0556</b> | 1 | No  | No  | Yes            | Hypo        |
| <b>SP0100</b> | 2 | Yes | Yes | No<br>No<br>No | N/A         |
| <b>SP0196</b> | 2 | Yes | Yes | No<br>No<br>No | N/A         |
| <b>SP0260</b> | 2 | Yes | Yes | No<br>No<br>No | N/A         |
| <b>SP0334</b> | 2 | Yes | Yes | No<br>No<br>No | N/A         |
| <b>SP0361</b> | 2 | Yes | Yes | No<br>No<br>No | N/A         |
| <b>SP0364</b> | 2 | Yes | Yes | No<br>No<br>No | N/A         |

| <b>Patient ID</b> | <b># of 1st Degree rels with verified Ca/type</b> | <b># of 2nd Degree rels with verified Ca/type</b> |
|-------------------|---------------------------------------------------|---------------------------------------------------|
| <b>BR9001</b>     | n=9: x5 BrCa, x1 BrCa/Oesph, x2 PC, x1 Bowel      | n=1: x1 Ov/BrCa                                   |
| <b>BR9002</b>     | n=1: x1 Brca                                      | n=5: x2 Brca, x1 PC, x1 unknown primary, x1 lung  |
| <b>BR9003</b>     | n=4: x3 BrCa, x1 PC                               | n=1: x1 OvCa                                      |
| <b>BR9004</b>     | n=2: x1 BrCa, x1 BrCa/OvCa                        | n=0                                               |
| <b>BR9005</b>     | n=2: x2 BrCa                                      | n=2; x2 BrCa                                      |
| <b>BR9013</b>     | n=2: x2 BrCa                                      | n=7: x1 Rectal/BrCa, x2 PC, x1 OvCa, x3 BrCa      |
| <b>BR9014</b>     | n=1: x1 unknown primary                           | n=2: x1 BrCa, x1 bowel                            |
| <b>BR9015</b>     | n=1: x1 PC                                        | n=4: x1 Br/OvCa, x3 PancCa,                       |
| <b>BR9016</b>     | n=2: x1 PC, x1 Bowel                              | n=2: x1 BrCa, x1 Lung                             |
| <b>BR9017</b>     | n=3: x1 PC, x1 Thyroid & BrCa, x1 Uterine         | n=1: x1 bowel                                     |
| <b>BR9018</b>     | n=2: x1 PC, x1 unknown primary                    | n=5: x2 BrCa, x1 OvCa, x1 Pancreatic, x1 Bowel    |
| <b>BR0001</b>     | Unknown                                           | Unknown                                           |
| <b>BR0450</b>     | Unknown                                           | Unknown                                           |
| <b>BR0556</b>     | Unknown                                           | Unknown                                           |
| <b>SP0100</b>     | N/A                                               | N/A                                               |

|               |     |     |
|---------------|-----|-----|
| <b>SP0196</b> | N/A | N/A |
| <b>SP0260</b> | N/A | N/A |
| <b>SP0334</b> | N/A | N/A |
| <b>SP0361</b> | N/A | N/A |
| <b>SP0364</b> | N/A | N/A |

### **Supplementary Table 1 | Summary and clinical data**

Summary data on sequencing statistics for the 19 specimens from the 14 *BRCA2*-mutant patients and 12 specimens from six sporadic patients including tissue type, coverage, number of lanes sequenced, and total aligned reads. The number of somatic SNVs in coding (nonsynonymous, synonymous, and stop-gain), splicing, and UTR regions predicted and annotated using SomaticSniper and Annovar, respectively. Also included is the number of various types of somatic genomic rearrangements including deletions, inversions, duplications, and interchromosomal translocations called using Delly. Chromothripsis scores were calculated using ShatterProof, while the presence of TMPRSS2-ERG fusions was determined by examining breakpoints on chromosome 21:39-42 Mbp. Clinical data is also provided, including the exact *BRCA2* mutation position and mutational effect, Gleason score, pre-treatment PSA level, pre-treatment T stage, and histological diagnosis. Availability of germline DNA and number of DNA specimens are also indicated.

|           | <b><i>BRCA2</i>-mutant<br/>vs. sporadic<br/>(<math>&lt; 50</math> yrs)</b> |                    | <b><i>BRCA2</i>-mutant<br/>vs. sporadic<br/>(<math>&gt; 50</math> yrs)</b> |                    |
|-----------|----------------------------------------------------------------------------|--------------------|----------------------------------------------------------------------------|--------------------|
|           | <b>P-value</b>                                                             | <b>Effect Size</b> | <b>P-value</b>                                                             | <b>Effect Size</b> |
| CNA count | 0.1                                                                        | 17.5               | 0.004                                                                      | 25.5               |
| GR count  | 0.000845809                                                                | 25                 | 0.05085553                                                                 | 8                  |
| SNV count | 0.01156451                                                                 | 1079.5             | 0.04023714                                                                 | 392                |
| PGA       | 0.000389816                                                                | 15.92              | 2.80E-006                                                                  | 13.5               |

**Supplementary Table 2 | Statistical analyses of mutational burden.**

Wilcoxon rank-sum test p-values comparing measures of mutational burden (including number of CNAs, GRs, SNVs, and PGA) between *BRCA2*-mutant and sporadic PCa.

| ID          | Description                          | T<br>(number of terms genes) | Q<br>(number of query genes) | Q&T<br>(number of common genes) | Total gene list | Enrichment | FDR     | Q&T list                                                                                                                                                                                                     |
|-------------|--------------------------------------|------------------------------|------------------------------|---------------------------------|-----------------|------------|---------|--------------------------------------------------------------------------------------------------------------------------------------------------------------------------------------------------------------|
| KEGG: 05032 | Morphine addiction                   | 91                           | 2601                         | 33                              | 20755           | 2.894      | < 0.001 | GNAS,GNG4,GNG12,PDE1A,PDE4B,PDE2A,GABRE,PDE3B,GNB2,PDE8A,GNGT1,GNB5,ADCY9,PRKCB,PRKX,GABRA4,GNAI3,GABRA5,ADCY6,ADRBK1,CACNA1A,PDE11A,GABRG3,GABRG2,GABRB3,KCNJ3,PDE10A,PRKCG,PDE7B,SLC32A1,OPRM1,PDE1B,KCNJ5 |
| KEGG: 04723 | Retrograde endocannabinoid signaling | 101                          | 2601                         | 32                              | 20755           | 2.528      | < 0.001 | GRIA3,GRIA4,GNG4,GNG12,GABRE,GNB2,GRM1,GNGT1,GNB5,ADCY9,PRKCB,PRKX,GABRA4,GNAI3,GABRA5,ADCY6,CACNA1A,ITPR1,MAPK10,GABRG3,GRIA1,GABRG2,GABRB3,KCNJ3,MAPK8,PRKCG,SLC32A1,PTGS2,GRIA2,GNAQ,SLC17A8,KCNJ5        |
| KEGG: 04713 | Circadian entrainment                | 96                           | 2601                         | 30                              | 20755           | 2.494      | < 0.001 | RYR2,GRIA3,GRIA4,GNAS,GNG4,GNG12,PRKG1,GNB2,GNGT1,GNB5,ADCY9,PRKCB,PRKX,GNAI3,ADCY6,ITPR1,PER3,RPS6KA5,CAMK2B,GRIA1,NOS1AP,KCNJ3,PRKCG,GRIN2C,GRIA2,GRIN2A,RYR3,GNAQ,RYR1,KCNJ5                              |
| KEGG: 04724 | Glutamatergic synapse                | 114                          | 2601                         | 32                              | 20755           | 2.240      | < 0.001 | GRIA3,GRM6,GRIA4,GNAS,GNG4,GNG12,GNB2,GRM1,GNGT1,GNB5,P                                                                                                                                                      |



|            |                                              |     |      |    |       |       |       |                                                                                                                                                                                                                                                                                                                                                                                                                                                                                                                                                     |
|------------|----------------------------------------------|-----|------|----|-------|-------|-------|-----------------------------------------------------------------------------------------------------------------------------------------------------------------------------------------------------------------------------------------------------------------------------------------------------------------------------------------------------------------------------------------------------------------------------------------------------------------------------------------------------------------------------------------------------|
|            |                                              |     |      |    |       |       |       | PP3CA,ADCY9,PRKCB,SHANK2,PRKX,GNAI3,SLC1A3,GRIK3,ADCY6,DLGAP1,ADRBK1,CACNA1A,ITPR1,GRIA1,KCNJ3,PRKCG,GRIN2C,GRIA2,GRIN2A,GNAQ,SLC1A2,SLC17A8                                                                                                                                                                                                                                                                                                                                                                                                        |
| KEGG:05033 | Nicotine addiction                           | 39  | 2601 | 15 | 20755 | 3.069 | 0.002 | GRIA3,GRIA4,GABRE,GABRA4,GABRA5,CACNA1A,GABRG3,GRIA1,GABRG2,GABRB3,GRIIN2C,SLC32A1,GRIA2,GRIN2A,SLC17A8                                                                                                                                                                                                                                                                                                                                                                                                                                             |
| GO:0051094 | positive regulation of developmental process | 470 | 2601 | 94 | 20755 | 1.596 | 0.005 | NRXN1,WNT7A,TGFBR2,SEMA5A,HMGB2,ANXA3,RP6S6KA3,ODZ4,GHRL,IFNG,SOX11,DMD,GATA3,FBXW8,NEUROD1,TNFSF4,HIPK1,SRY,PRKCB,PROM1,GCNT2,BMP10,TWIST1,EPHB2,TFAP2A,SMYD1,PAX8,BASP1,POU4F2,RUNX1,DDR2,DKK1,NUMB,NELL1,CASP8,VHL,GLI2,ZEB1,INSM1,BMP4,MYOG,CTNNA1,ETS1,BDNF,NKX6-1,BHLHB9,GREM1,SOX6,NRP1,THBS1,MKL2,HMGA2,SOX9,OTX2,MAP2K6,ASB4,BCL9L,F3,TBX5,IL1RAPL1,ARNTL,FLT1,CD53,HDAC9,CAMK2B,PTPRD,NKX2-5,VNN1,ATOH1,MUL1,ZBTB1,TAL1,VWC2,ANGPT4,HOXD3,MFF,RBPJ,CTGF,COL1A1,NPTN,ASXL2,ACVR1,PTGS2,RGS14,BMP6,LRP5,TMEM100,NGF,TCF7L2,BMP5,ACVR2A,PACS |

|            |                                           |     |      |    |       |       |       |                                                                                                                                                                                                                                                                                                                                                                                                     |
|------------|-------------------------------------------|-----|------|----|-------|-------|-------|-----------------------------------------------------------------------------------------------------------------------------------------------------------------------------------------------------------------------------------------------------------------------------------------------------------------------------------------------------------------------------------------------------|
|            |                                           |     |      |    |       |       |       | IN1,OPRM1,BMP2                                                                                                                                                                                                                                                                                                                                                                                      |
| GO:0007416 | synapse assembly                          | 56  | 2601 | 20 | 20755 | 2.850 | 0.006 | NRXN1,WNT7A,GHRL,SHANK2,NLGN4X,EPHB2,PCDHB3,BDNF,BHLHB9,DNM3,IL1RAPL1,PTPRD,PCDHB13,NRXN2,PCDHB5,PDLIM5,LRP4,PCDHB14,NLGN4Y,PCDHB2                                                                                                                                                                                                                                                                  |
| GO:0060284 | regulation of cell development            | 297 | 2601 | 65 | 20755 | 1.746 | 0.006 | ID2,WNT7A,SEMA5A,ODZ4,IFNG,SOX11,DMD,FBXW8,NEUROD1,SARM1,FGF13,GCNT2,BMP10,RAPGEF1,KIAA0319,EPHA4,TWIST1,CNOT2,SMYD1,CHN1,PAX8,CDK1,NUMB,ZEB1,BMP4,MYOG,LTK,GF11,PAX6,NEDD4,NKX6-1,SIPA1L1,BHLHB9,GREM1,NRP1,CNTN4,COL3A1,LRRRC4C,HMGA2,SOX9,BCL9L,TBX5,ELL3,IL1RAPL1,ARNTL,HDAC9,CAMK2B,PTPRD,NKX2-5,ATOH1,SOX3,TRPV4,VWC2,RUFY3,PDLIM5,HOXD3,CCDC88A,COL1A1,NPTN,RGS14,LRRP4,NGF,SSH2,TCF7L2,KLK8 |
| REAC:74736 | GRB2:SOS binds IRS-P                      | 4   | 2590 | 4  | 20755 | 8.014 | 0.008 | IRS1,IRS2,SOS1,GRB2                                                                                                                                                                                                                                                                                                                                                                                 |
| GO:0002067 | glandular epithelial cell differentiation | 18  | 2601 | 10 | 20755 | 4.433 | 0.009 | NEUROD1,CDK6,INSM1,BMP4,PAX6,NKX6-1,ARNTL,PDX1,BMP6,BMP5                                                                                                                                                                                                                                                                                                                                            |
| GO:0050767 | regulation of neurogenesis                | 214 | 2601 | 50 | 20755 | 1.864 | 0.010 | ID2,WNT7A,SEMA5A,ODZ4,SOX11,DMD,FBXW8,NEUROD1,SARM1,FGF13,RAPGEF1,KIAA0319,EPHA4,CHN1,CDK1,NUMB,ZEB1,LTK,GF11,PAX6,N                                                                                                                                                                                                                                                                                |

|            |                                                                    |     |      |    |       |       |       |                                                                                                                                                                                                                                                                                                                                  |
|------------|--------------------------------------------------------------------|-----|------|----|-------|-------|-------|----------------------------------------------------------------------------------------------------------------------------------------------------------------------------------------------------------------------------------------------------------------------------------------------------------------------------------|
|            |                                                                    |     |      |    |       |       |       | EDD4,SIPA1L1,BHLHB9,NRP1,CNTN4,COL3A1,LRRC4C,SOX9,IL1RAPL1,ARNTL,CAMK2B,PTPRD,NKX2-5,ATOH1,SOX3,TRPV4,VWC2,RUFY3,PDLIM5,HOXD3,CCDC88A,NPTN,RGS14,LRP4,NGF,SSH2,CLK8,BMP5,PACSIN1,OPRM1                                                                                                                                           |
| GO:0071709 | membrane assembly                                                  | 12  | 2601 | 8  | 20755 | 5.320 | 0.010 | NRXN1,ANK3,NLG N4X,IL1RAPL1,PTPRD,NRXN2,SPTBN1,LRP4                                                                                                                                                                                                                                                                              |
| GO:0035883 | enteroendocrine cell differentiation                               | 15  | 2601 | 9  | 20755 | 4.788 | 0.011 | NEUROD1,CDK6,INSM1,BMP4,PAX6,NKX6-1,ARNTL,PDX1,BMP6                                                                                                                                                                                                                                                                              |
| GO:0044091 | membrane biogenesis                                                | 15  | 2601 | 9  | 20755 | 4.788 | 0.011 | NRXN1,ANK3,NLG N4X,IL1RAPL1,PTPRD,NRXN2,SPTBN1,LRP4,CLIP3                                                                                                                                                                                                                                                                        |
| GO:2000679 | positive regulation of transcription regulatory region DNA binding | 7   | 2601 | 6  | 20755 | 6.840 | 0.012 | GATA3,NEUROD1,HAND2,TWIST1,HMGA2,TGFB1                                                                                                                                                                                                                                                                                           |
| GO:0051960 | regulation of nervous system development                           | 239 | 2601 | 54 | 20755 | 1.803 | 0.013 | ID2,NRXN1,WNT7A,SEMA5A,ODZ4,GHRL,SOX11,DM D,FBXW8,NEUROD1,SARM1,FGF13,RAPGEF1,KIAA0319,EPHA4,EPHB2,CHN1,CDK1,NUMB,ZEB1,LTK,GFI1,PAX6,NEDD4,BDNF,SIPA1L1,BHLHB9,NRP1,CNTN4,COL3A1,LRRC4C,SOX9,IL1RAPL1,ARNTL,CAMK2B,PTPRD,NKX2-5,ATOH1,SOX3,TRPV4,VWC2,RUFY3,PDLIM5,HOXD3,CCDC88A,NPTN,RGS14,LRP4,NGF,SSH2,CLK8,BMP5,PACSIN1,OPRM |

|             |                                                 |     |      |    |       |       |       |                                                                                                                                                                                              |
|-------------|-------------------------------------------------|-----|------|----|-------|-------|-------|----------------------------------------------------------------------------------------------------------------------------------------------------------------------------------------------|
|             |                                                 |     |      |    |       |       |       | 1                                                                                                                                                                                            |
| KEGG:04728  | Dopaminergic synapse                            | 130 | 2601 | 31 | 20755 | 1.903 | 0.018 | GRIA3,GRIA4,GNAS,GNG4,GNG12,PPP2R2B,GNB2,NGT1,GNB5,PPP3CA,PRKCB,PRKX,GNAL,GNAI3,CACNA1A,ITPR1,KIF5C,MAPK10,PPP2R5C,ARNTL,SLC18A2,ATF2,CAMK2B,GRIA1,KCNJ3,MAPK8,PRKCG,GRIA2,GRIN2A,GNAQ,KCNJ5 |
| GO:0048568  | embryonic organ development                     | 122 | 2601 | 32 | 20755 | 2.093 | 0.028 | RYR2,ID2,TGFBR2,STIL,TCF21,SOX11,NEUROD1,HAND2,DSCAML1,TWIST1,EPHB2,TFAP2A,PAX8,KDM2B,CASP8,GLI2,SOX17,SOX9,RARB,COL2A1,KIT,TGFBR1,PKD2,NKX2-5,VANGL2,TAL1,KITLG,HOXD3,RBPJ,NIPBL,ACVR1,FUZ  |
| REAC:194138 | Signaling by VEGF                               | 11  | 2590 | 6  | 20755 | 4.371 | 0.034 | VEGFC,NRP1,FLT1,NRP2,FIGF,KDR                                                                                                                                                                |
| REAC:194313 | VEGF ligand-receptor interactions               | 11  | 2590 | 6  | 20755 | 4.371 | 0.034 | VEGFC,NRP1,FLT1,NRP2,FIGF,KDR                                                                                                                                                                |
| REAC:194306 | Neurophilin interactions with VEGF and VEGFR    | 5   | 2590 | 4  | 20755 | 6.411 | 0.037 | NRP1,FLT1,NRP2,KDR                                                                                                                                                                           |
| REAC:109823 | SOS phosphorylation and dissociation (IRS)      | 5   | 2590 | 4  | 20755 | 6.411 | 0.037 | IRS1,IRS2,SOS1,GRB2                                                                                                                                                                          |
| REAC:173512 | I-SMAD competes with R-SMAD for type I receptor | 5   | 2590 | 4  | 20755 | 6.411 | 0.037 | TGFBR2,SMAD6,TGFBR1,TGFB1                                                                                                                                                                    |
| REAC:265177 | Exocyst complex formation                       | 8   | 2590 | 5  | 20755 | 5.008 | 0.042 | EXOC7,EXOC4,EXOC2,EXOC5,EXOC1                                                                                                                                                                |
| KEGG:04510  | Focal adhesion                                  | 208 | 2601 | 43 | 20755 | 1.650 | 0.043 | TNXB,ACTN2,CAPN2,PIK3R3,PAK7,PRKCB,PPP1R12A,IGF1R,MYLK4,R                                                                                                                                    |

|            |                                      |     |      |    |       |       |       |                                                                                                                                                                                                                                                              |
|------------|--------------------------------------|-----|------|----|-------|-------|-------|--------------------------------------------------------------------------------------------------------------------------------------------------------------------------------------------------------------------------------------------------------------|
|            |                                      |     |      |    |       |       |       | APGEF1,TNR,BIRC2,COL11A2,SOS1,GRB2,VEGFC,ACTN1,PXN,SHC3,ITGA1,FN1,THBS1,MAPK10,COL3A1,COL2A1,ITGA2,FLT1,SHC1,FIGF,COL4A5,MAPK8,ITGB7,PRKCG,TLN2,PARVB,COL1A1,COL4A1,ITGA4,PDGFD,PPP1R12B,IBSP,COL11A1,KDR                                                    |
| KEGG:04727 | GABAergic synapse                    | 87  | 2601 | 22 | 20755 | 2.018 | 0.050 | GNG4,GNG12,SLC6A1,GABRE,GNB2,GNGT1,GNB5,GPHN,ADCY9,PRKCB,PRKX,GABRA4,GNAI3,GABRA5,ADCY6,CACNA1A,GABRG3,SLC6A13,GABRG2,GABRB3,PRKCG,SLC32A1                                                                                                                   |
| GO:0045664 | regulation of neuron differentiation | 181 | 2601 | 42 | 20755 | 1.852 | 0.050 | ID2,SEMA5A,SOX11,DMD,FBXW8,NEUROD1,SARM1,FGF13,RAPGEF1,KIAA0319,EPHA4,CHN1,ZEB1,LTK,GFI1,NEDD4,SIPAL1,BHLHB9,NRP1,CNTN4,LRRC4C,SOX9,IL1RAPL1,CAMK2B,PTPRD,NKX2-5,ATOH1,SOX3,TRPV4,VWC2,RUFY3,PDLIM5,HOXD3,CCDC88A,NPTN,LRP4,NGF,SSH2,KLK8,BMP5,PACSLIN1,BMP2 |
| REAC:75178 | Formation of Platelet plug           | 120 | 2590 | 27 | 20755 | 1.803 | 0.050 | GNG4,GNG12,ACTN2,GNB2,GNGT1,GNB5,PRKCB,APBB1IP,SELP,ALB,SOS1,GRB2,VEGFC,ACTN1,FGA,ITPR1,FN1,THBS1,ITGA2,LAMP2,FIGF,PPBP,COL1A1,FGG,GNAQ,GP6,TGFB1                                                                                                            |

### **Supplementary Table 3 | g:Profiler analysis of differentially methylated genes**

Enriched pathways ( $p < 0.05$ ) from a g:Profiler analysis including gene ontology: biological process, KEGG, and REACTOME are specified. These pathways are enriched in genes showing significant differential methylation between *BRCA2*-mutant and sporadic PCa.
